# Supplementary material for: Identification and validation for biomarkers associated with mitochondrial metabolism in chronic obstructive pulmonary disease
Source: Front Med (Lausanne). 2025 Aug 25;12:1612390. doi: 10.3389/fmed.2025.1612390 (PMC12414765; doi:10.3389/fmed.2025.1612390)
Supplement: Supplementary file 1 [file Table_1.xlsx]

## Sheet: 01.GO_res
ONTOLOGY	ID	Description	GeneRatio	BgRatio	pvalue	p.adjust	qvalue	geneID	Count	richFactor
BP	GO:0006644	phospholipid metabolic process	17/51	389/18903	1.17326899091637e-16	1.43842778286347e-13	9.54670452608792e-14	LCAT/GDPD3/TMEM86B/MTMR8/SGMS2/FITM1/APOA2/PLA2G4E/PLA2G1B/LIPG/PLA2G2A/APOA1/DGKB/SLC44A5/PLA2G2D/LIPI/TPTE	17	0.0437017994858612
BP	GO:0016042	lipid catabolic process	16/51	336/18903	2.84204315314827e-16	1.74217245287989e-13	1.15626281967559e-13	ETFB/GDPD3/CYP1B1/DECR2/APOA2/PLA2G4E/CYP4F3/PLA2G1B/LIPG/PLA2G2A/ABCB11/APOA1/PLA2G2D/CYP19A1/LIPI/SRD5A2	16	0.0476190476190476
BP	GO:0006650	glycerophospholipid metabolic process	14/51	311/18903	5.94795002501579e-14	2.43072891022312e-11	1.61325100678498e-11	LCAT/GDPD3/TMEM86B/MTMR8/APOA2/PLA2G4E/PLA2G1B/PLA2G2A/APOA1/DGKB/SLC44A5/PLA2G2D/LIPI/TPTE	14	0.045016077170418
BP	GO:0046486	glycerolipid metabolic process	15/51	399/18903	9.04151038899463e-14	2.77122293422685e-11	1.83923356070864e-11	LCAT/GDPD3/TMEM86B/MTMR8/APOA2/PLA2G4E/PLA2G1B/LIPG/PLA2G2A/APOA1/DGKB/SLC44A5/PLA2G2D/LIPI/TPTE	15	0.037593984962406
BP	GO:0046470	phosphatidylcholine metabolic process	9/51	77/18903	5.0526080434576e-13	1.2388994922558e-10	8.22245477387942e-11	LCAT/GDPD3/TMEM86B/APOA2/PLA2G1B/PLA2G2A/APOA1/SLC44A5/PLA2G2D	9	0.116883116883117
BP	GO:0006631	fatty acid metabolic process	13/51	400/18903	3.23051745911806e-11	6.60102400813125e-09	4.38103508052327e-09	ETFB/CYP1B1/DECR2/CYP4F3/PLA2G1B/LIPG/PTGS2/ABCB11/ADH4/APOA1/AWAT1/LIPI/TH	13	0.0325
BP	GO:0030258	lipid modification	10/51	213/18903	2.28123099263124e-10	3.99541313852272e-08	2.65171662752474e-08	ETFB/LCAT/MTMR8/DECR2/SGPP2/ABCB11/ADH4/APOA1/DGKB/TPTE	10	0.0469483568075117
BP	GO:0010876	lipid localization	13/51	483/18903	3.31204403042218e-10	4.65814950298351e-08	3.09156827149159e-08	LCAT/FITM1/APOA2/PLA2G1B/LIPG/PLA2G2A/PTGS2/ABCB11/APOA1/PLA2G2D/CYP19A1/STARD6/CIDEC	13	0.0269151138716356
BP	GO:0044242	cellular lipid catabolic process	10/51	222/18903	3.41952247364205e-10	4.65814950298351e-08	3.09156827149159e-08	ETFB/GDPD3/CYP1B1/DECR2/APOA2/PLA2G4E/LIPG/ABCB11/APOA1/LIPI	10	0.045045045045045
BP	GO:0006869	lipid transport	12/51	433/18903	1.26886477357809e-09	1.55562821240674e-07	1.03245523155354e-07	LCAT/APOA2/PLA2G1B/LIPG/PLA2G2A/PTGS2/ABCB11/APOA1/PLA2G2D/CYP19A1/STARD6/CIDEC	12	0.0277136258660508
BP	GO:0034368	protein-lipid complex remodeling	5/51	30/18903	1.5828590329135e-08	1.61715431195996e-06	1.07328950214222e-06	LCAT/APOA2/LIPG/PLA2G2A/APOA1	5	0.166666666666667
BP	GO:0034369	plasma lipoprotein particle remodeling	5/51	30/18903	1.5828590329135e-08	1.61715431195996e-06	1.07328950214222e-06	LCAT/APOA2/LIPG/PLA2G2A/APOA1	5	0.166666666666667
BP	GO:0034367	protein-containing complex remodeling	5/51	32/18903	2.22768472255891e-08	2.10087805373633e-06	1.39433221905914e-06	LCAT/APOA2/LIPG/PLA2G2A/APOA1	5	0.15625
BP	GO:0046503	glycerolipid catabolic process	6/51	68/18903	2.74284086726446e-08	2.40194493090444e-06	1.59414736119957e-06	GDPD3/APOA2/PLA2G4E/LIPG/APOA1/LIPI	6	0.0882352941176471
BP	GO:0034375	high-density lipoprotein particle remodeling	4/51	16/18903	8.35001485718019e-08	6.82474547660195e-06	4.52951683129845e-06	LCAT/APOA2/LIPG/APOA1	4	0.25
BP	GO:0071827	plasma lipoprotein particle organization	5/51	45/18903	1.31635423049474e-07	1.00865642911659e-05	6.6943540800818e-06	LCAT/APOA2/LIPG/PLA2G2A/APOA1	5	0.111111111111111
BP	GO:0008202	steroid metabolic process	9/51	323/18903	1.79881201476958e-07	1.24894128510392e-05	8.28910117099106e-06	LCAT/CYP1B1/LRP2/CYP21A2/APOA2/ABCB11/APOA1/CYP19A1/SRD5A2	9	0.0278637770897833
BP	GO:0071825	protein-lipid complex subunit organization	5/51	48/18903	1.83368214778716e-07	1.24894128510392e-05	8.28910117099106e-06	LCAT/APOA2/LIPG/PLA2G2A/APOA1	5	0.104166666666667
BP	GO:0043691	reverse cholesterol transport	4/51	20/18903	2.20521978708636e-07	1.40752971665235e-05	9.3416370822724e-06	LCAT/APOA2/LIPG/APOA1	4	0.2
BP	GO:0120254	olefinic compound metabolic process	7/51	160/18903	2.31083442266424e-07	1.40752971665235e-05	9.3416370822724e-06	CYP1B1/CYP4F3/PTGS2/ADH4/AWAT1/CYP19A1/SRD5A2	7	0.04375
BP	GO:0046434	organophosphate catabolic process	7/51	161/18903	2.41093997142735e-07	1.40752971665235e-05	9.3416370822724e-06	GDPD3/APOA2/PLA2G4E/NT5C1A/LIPG/DPYS/ENTPD8	7	0.0434782608695652
BP	GO:0008654	phospholipid biosynthetic process	8/51	259/18903	4.26617978302281e-07	2.37742564272089e-05	1.57787414941466e-05	LCAT/SGMS2/FITM1/APOA2/APOA1/DGKB/SLC44A5/LIPI	8	0.0308880308880309
BP	GO:0006066	alcohol metabolic process	9/51	367/18903	5.26560093826881e-07	2.8067942392685e-05	1.86284188800082e-05	LCAT/GDPD3/CYP1B1/LRP2/DEGS2/SGPP2/APOA2/ADH4/APOA1	9	0.0245231607629428
BP	GO:0006656	phosphatidylcholine biosynthetic process	4/51	29/18903	1.06184726820822e-06	5.42426979509698e-05	3.6000348172147e-05	LCAT/APOA2/APOA1/SLC44A5	4	0.137931034482759
BP	GO:0042180	cellular ketone metabolic process	7/51	218/18903	1.85420715271821e-06	8.74329988166354e-05	5.80284262773754e-05	CYP4F3/PTGS2/ABCB11/ADH4/APOA1/CYP19A1/SRD5A2	7	0.0321100917431193
BP	GO:0072330	monocarboxylic acid biosynthetic process	7/51	218/18903	1.85420715271821e-06	8.74329988166354e-05	5.80284262773754e-05	DECR2/PLA2G1B/LIPG/PTGS2/ABCB11/APOA1/LIPI	7	0.0321100917431193
BP	GO:0034754	cellular hormone metabolic process	6/51	141/18903	2.11517429770773e-06	9.60445810736917e-05	6.37438492057729e-05	CYP1B1/CYP21A2/ADH4/CYP19A1/SRD5A2/UGT1A9	6	0.0425531914893617
BP	GO:0046394	carboxylic acid biosynthetic process	8/51	326/18903	2.39846742025287e-06	0.000105018609186787	6.9699823904341e-05	DECR2/PLA2G1B/LIPG/PTGS2/ABCB11/APOA1/OTC/LIPI	8	0.0245398773006135
BP	GO:0016053	organic acid biosynthetic process	8/51	328/18903	2.50983065532028e-06	0.000106105254600782	7.0421019838932e-05	DECR2/PLA2G1B/LIPG/PTGS2/ABCB11/APOA1/OTC/LIPI	8	0.024390243902439
BP	GO:0097006	regulation of plasma lipoprotein particle levels	5/51	84/18903	3.07318485940928e-06	0.000125590821254526	8.33533998709955e-05	LCAT/APOA2/LIPG/PLA2G2A/APOA1	5	0.0595238095238095
BP	GO:0016125	sterol metabolic process	6/51	154/18903	3.52871671646157e-06	0.00013805801440026	9.16277540408697e-05	LCAT/CYP1B1/CYP21A2/APOA2/APOA1/CYP19A1	6	0.038961038961039
BP	GO:0042445	hormone metabolic process	7/51	241/18903	3.60347182773925e-06	0.00013805801440026	9.16277540408697e-05	CYP1B1/CYP21A2/ADH4/TPO/CYP19A1/SRD5A2/UGT1A9	7	0.029045643153527
BP	GO:0034370	triglyceride-rich lipoprotein particle remodeling	3/51	12/18903	4.00116128028567e-06	0.000144277168518536	9.57553458099327e-05	LCAT/APOA2/APOA1	3	0.25
BP	GO:0034372	very-low-density lipoprotein particle remodeling	3/51	12/18903	4.00116128028567e-06	0.000144277168518536	9.57553458099327e-05	LCAT/APOA2/APOA1	3	0.25
BP	GO:0046461	neutral lipid catabolic process	4/51	41/18903	4.42073785393976e-06	0.000150550683581393	9.99190164062992e-05	APOA2/LIPG/APOA1/LIPI	4	0.0975609756097561
BP	GO:0046464	acylglycerol catabolic process	4/51	41/18903	4.42073785393976e-06	0.000150550683581393	9.99190164062992e-05	APOA2/LIPG/APOA1/LIPI	4	0.0975609756097561
BP	GO:0006633	fatty acid biosynthetic process	6/51	164/18903	5.07364173007638e-06	0.000168115804353342	0.000111576815287313	DECR2/PLA2G1B/LIPG/PTGS2/APOA1/LIPI	6	0.0365853658536585
BP	GO:0042632	cholesterol homeostasis	5/51	100/18903	7.25528872876918e-06	0.000233482690388642	0.000154960178303787	LCAT/APOA2/LIPG/ABCB11/APOA1	5	0.05
BP	GO:0022900	electron transport chain	6/51	176/18903	7.6111362220367e-06	0.000233482690388642	0.000154960178303787	NDUFB7/ETFB/NDUFA7/FDX2/COX4I2/CYP19A1	6	0.0340909090909091
BP	GO:0055092	sterol homeostasis	5/51	101/18903	7.61770604856907e-06	0.000233482690388642	0.000154960178303787	LCAT/APOA2/LIPG/ABCB11/APOA1	5	0.0495049504950495
BP	GO:0034380	high-density lipoprotein particle assembly	3/51	15/18903	8.22797274144367e-06	0.000238830374615834	0.000158509384028539	LCAT/APOA2/APOA1	3	0.2
BP	GO:0034384	high-density lipoprotein particle clearance	3/51	15/18903	8.22797274144367e-06	0.000238830374615834	0.000158509384028539	APOA2/LIPG/APOA1	3	0.2
BP	GO:0032309	icosanoid secretion	4/51	48/18903	8.37659552078373e-06	0.000238830374615834	0.000158509384028539	PLA2G1B/PLA2G2A/PTGS2/PLA2G2D	4	0.0833333333333333
BP	GO:0055091	phospholipid homeostasis	3/51	16/18903	1.01074664167218e-05	0.000281630768793203	0.000186915587084353	LIPG/ABCB11/APOA1	3	0.1875
BP	GO:0009395	phospholipid catabolic process	4/51	54/18903	1.34530746572592e-05	0.000366521545106661	0.000243256765147634	GDPD3/APOA2/PLA2G4E/LIPG	4	0.0740740740740741
BP	GO:0033559	unsaturated fatty acid metabolic process	5/51	115/18903	1.43471167870505e-05	0.000382381851759216	0.000253783095569566	CYP1B1/DECR2/CYP4F3/PTGS2/AWAT1	5	0.0434782608695652
BP	GO:0030540	female genitalia development	3/51	18/18903	1.46720337427898e-05	0.000382721561035325	0.000254008557293987	LRP2/CYP19A1/SRD5A2	3	0.166666666666667
BP	GO:0071715	icosanoid transport	4/51	56/18903	1.55622529039032e-05	0.000397485876253862	0.000263807488919237	PLA2G1B/PLA2G2A/PTGS2/PLA2G2D	4	0.0714285714285714
BP	GO:0015718	monocarboxylic acid transport	5/51	119/18903	1.69352487922492e-05	0.000423726837128521	0.000281223358032409	PLA2G1B/PLA2G2A/PTGS2/ABCB11/PLA2G2D	5	0.0420168067226891
BP	GO:0019369	arachidonic acid metabolic process	4/51	58/18903	1.79052154999882e-05	0.00043903588405971	0.000291383822768229	CYP1B1/CYP4F3/PTGS2/AWAT1	4	0.0689655172413793
BP	GO:0006720	isoprenoid metabolic process	5/51	121/18903	1.83586891313606e-05	0.000441328487746042	0.000292905401414691	CYP1B1/LRP2/ADH4/TH/UGT1A9	5	0.0413223140495868
BP	GO:0009410	response to xenobiotic stimulus	8/51	432/18903	1.87682854226421e-05	0.000442498421695369	0.000293681875135675	CYP1B1/APOA2/PTGS2/ABCB11/OTC/TH/SRD5A2/UGT1A9	8	0.0185185185185185
BP	GO:0006690	icosanoid metabolic process	5/51	126/18903	2.23267708504005e-05	0.000516464548350774	0.000342772470056794	CYP1B1/CYP4F3/PLA2G1B/PTGS2/AWAT1	5	0.0396825396825397
BP	GO:0046474	glycerophospholipid biosynthetic process	6/51	214/18903	2.31114350445293e-05	0.000524715173418388	0.000348248329228483	LCAT/APOA2/APOA1/DGKB/SLC44A5/LIPI	6	0.0280373831775701
BP	GO:0006639	acylglycerol metabolic process	5/51	132/18903	2.79360944752842e-05	0.000622720942303608	0.00041329379960564	APOA2/LIPG/APOA1/DGKB/LIPI	5	0.0378787878787879
BP	GO:0006638	neutral lipid metabolic process	5/51	133/18903	2.89685794077283e-05	0.00063420497060491	0.00042091563688297	APOA2/LIPG/APOA1/DGKB/LIPI	5	0.037593984962406
BP	GO:0042446	hormone biosynthetic process	4/51	68/18903	3.3692907205074e-05	0.000724693056726679	0.000480971694728018	CYP21A2/TPO/CYP19A1/SRD5A2	4	0.0588235294117647
BP	GO:0051384	response to glucocorticoid	5/51	142/18903	3.96557216579608e-05	0.000838239909528619	0.000556331630519123	LCAT/CYP1B1/APOA2/PTGS2/TH	5	0.0352112676056338
BP	GO:0034377	plasma lipoprotein particle assembly	3/51	26/18903	4.60426038324917e-05	0.000956749699976862	0.000634985419491813	LCAT/APOA2/APOA1	3	0.115384615384615
BP	GO:0046395	carboxylic acid catabolic process	6/51	243/18903	4.70906542344717e-05	0.000962219034857705	0.00063861536356573	ETFB/DECR2/CYP4F3/ALDH1L1/ABCB11/OTC	6	0.0246913580246914
BP	GO:1901617	organic hydroxy compound biosynthetic process	6/51	245/18903	4.92879408489905e-05	0.000990606811161677	0.000657456053084894	PNMT/ABCB11/APOA1/CYP19A1/TH/SRD5A2	6	0.0244897959183673
BP	GO:0016054	organic acid catabolic process	6/51	247/18903	5.15667019022523e-05	0.00100608792805767	0.000667730718973626	ETFB/DECR2/CYP4F3/ALDH1L1/ABCB11/OTC	6	0.0242914979757085
BP	GO:0042537	benzene-containing compound metabolic process	3/51	27/18903	5.16994612297173e-05	0.00100608792805767	0.000667730718973626	CYP1B1/TH/SRD5A2	3	0.111111111111111
BP	GO:0009123	nucleoside monophosphate metabolic process	4/51	77/18903	5.4996144514922e-05	0.00105351989336397	0.000699210850493992	APRT/NT5C1A/DPYS/ENTPD8	4	0.051948051948052
BP	GO:0046337	phosphatidylethanolamine metabolic process	3/51	28/18903	5.77933315391559e-05	0.00109007114564623	0.000723469559186519	PLA2G4E/PLA2G2A/PLA2G2D	3	0.107142857142857
BP	GO:0045017	glycerolipid biosynthetic process	6/51	254/18903	6.021640574095e-05	0.00111856535512734	0.000742380887364503	LCAT/APOA2/APOA1/DGKB/SLC44A5/LIPI	6	0.0236220472440945
BP	GO:0065005	protein-lipid complex assembly	3/51	29/18903	6.43392720319576e-05	0.0011773126494206	0.000781370892077035	LCAT/APOA2/APOA1	3	0.103448275862069
BP	GO:0044282	small molecule catabolic process	7/51	385/18903	7.36495038270602e-05	0.00132785723076435	0.000881285858487888	ETFB/DECR2/CYP4F3/ALDH1L1/ABCB11/ADH4/OTC	7	0.0181818181818182
BP	GO:0019433	triglyceride catabolic process	3/51	31/18903	7.88469751090237e-05	0.00140096219541541	0.00092980490860832	LIPG/APOA1/LIPI	3	0.0967741935483871
BP	GO:0031960	response to corticosteroid	5/51	165/18903	8.09834864189364e-05	0.00141836791928023	0.00094135691732087	LCAT/CYP1B1/APOA2/PTGS2/TH	5	0.0303030303030303
BP	GO:0034311	diol metabolic process	3/51	32/18903	8.68382365809681e-05	0.0014584065486064	0.000967930164053185	LRP2/DEGS2/SGPP2	3	0.09375
BP	GO:0050482	arachidonic acid secretion	3/51	32/18903	8.68382365809681e-05	0.0014584065486064	0.000967930164053185	PLA2G1B/PLA2G2A/PLA2G2D	3	0.09375
BP	GO:1903963	arachidonate transport	3/51	32/18903	8.68382365809681e-05	0.0014584065486064	0.000967930164053185	PLA2G1B/PLA2G2A/PLA2G2D	3	0.09375
BP	GO:0001523	retinoid metabolic process	4/51	87/18903	8.86807450222175e-05	0.00146922423509782	0.000975109756787684	CYP1B1/LRP2/ADH4/UGT1A9	4	0.0459770114942529
BP	GO:0016101	diterpenoid metabolic process	4/51	90/18903	0.000101195716006913	0.00165421263765967	0.00109788475050307	CYP1B1/LRP2/ADH4/UGT1A9	4	0.0444444444444444
BP	GO:0055088	lipid homeostasis	5/51	174/18903	0.000104038184303497	0.00167830018363272	0.00111387141920503	LCAT/APOA2/LIPG/ABCB11/APOA1	5	0.028735632183908
BP	GO:0006694	steroid biosynthetic process	5/51	178/18903	0.000115770860344338	0.00184331265950855	0.00122338858573032	CYP21A2/ABCB11/APOA1/CYP19A1/SRD5A2	5	0.0280898876404494
BP	GO:0046942	carboxylic acid transport	6/51	290/18903	0.000124847099516941	0.00196234030779192	0.00130238607188388	LRP2/PLA2G1B/PLA2G2A/PTGS2/ABCB11/PLA2G2D	6	0.0206896551724138
BP	GO:0043434	response to peptide hormone	7/51	421/18903	0.00012850984839509	0.00198641052598628	0.00131836124030857	APRT/CYP1B1/PLA2G1B/PTGS2/OTC/TH/SRD5A2	7	0.0166270783847981
BP	GO:0015850	organic hydroxy compound transport	6/51	292/18903	0.000129618957650002	0.00198641052598628	0.00131836124030857	LCAT/APOA2/LIPG/ABCB11/APOA1/CYP19A1	6	0.0205479452054795
BP	GO:0046473	phosphatidic acid metabolic process	3/51	37/18903	0.000134747685704727	0.00203951435399994	0.00135360573164073	PLA2G2A/DGKB/LIPI	3	0.0810810810810811
BP	GO:1905952	regulation of lipid localization	5/51	185/18903	0.000138720591880041	0.00207404202006013	0.00137652140594701	FITM1/APOA2/LIPG/APOA1/CYP19A1	5	0.027027027027027
BP	GO:0006721	terpenoid metabolic process	4/51	101/18903	0.000158209376210193	0.0023369240389602	0.00155099363107773	CYP1B1/LRP2/ADH4/UGT1A9	4	0.0396039603960396
BP	GO:1901293	nucleoside phosphate biosynthetic process	6/51	306/18903	0.000167228216497638	0.00244073563602505	0.00161989237284053	ATP5MC1/APRT/NDUFB7/NDUFA7/NME3/ENTPD8	6	0.0196078431372549
BP	GO:0006641	triglyceride metabolic process	4/51	104/18903	0.000177115895868362	0.00255463633334837	0.00169548715178011	APOA2/LIPG/APOA1/LIPI	4	0.0384615384615385
BP	GO:0120178	steroid hormone biosynthetic process	3/51	41/18903	0.000183465997728673	0.00261545713041108	0.00173585332000323	CYP21A2/CYP19A1/SRD5A2	3	0.0731707317073171
BP	GO:0019395	fatty acid oxidation	4/51	110/18903	0.000219747980187808	0.00309667843345118	0.00205523519280309	ETFB/DECR2/ABCB11/ADH4	4	0.0363636363636364
BP	GO:0001676	long-chain fatty acid metabolic process	4/51	111/18903	0.000227511324205174	0.00316964640313117	0.00210366332070095	CYP1B1/CYP4F3/PTGS2/AWAT1	4	0.036036036036036
BP	GO:0009259	ribonucleotide metabolic process	7/51	466/18903	0.000239731764096049	0.00326103217195554	0.00216431516177697	ATP5MC1/APRT/NDUFB7/NDUFA7/NME3/NT5C1A/DPYS	7	0.0150214592274678
BP	GO:0046839	phospholipid dephosphorylation	3/51	45/18903	0.000242370650375681	0.00326103217195554	0.00216431516177697	MTMR8/SGPP2/TPTE	3	0.0666666666666667
BP	GO:1905954	positive regulation of lipid localization	4/51	113/18903	0.000243627998210156	0.00326103217195554	0.00216431516177697	FITM1/LIPG/APOA1/CYP19A1	4	0.0353982300884956
BP	GO:0006643	membrane lipid metabolic process	5/51	209/18903	0.00024471040768345	0.00326103217195554	0.00216431516177697	CYP1B1/DEGS2/SGMS2/SGPP2/TH	5	0.0239234449760766
BP	GO:0048806	genitalia development	3/51	46/18903	0.000258788157976715	0.0034115514159081	0.00226421331200907	LRP2/CYP19A1/SRD5A2	3	0.0652173913043478
BP	GO:0019693	ribose phosphate metabolic process	7/51	475/18903	0.000269303633404519	0.00347566807149956	0.0023067669093064	ATP5MC1/APRT/NDUFB7/NDUFA7/NME3/NT5C1A/DPYS	7	0.0147368421052632
BP	GO:0034440	lipid oxidation	4/51	116/18903	0.000269321751054207	0.00347566807149956	0.0023067669093064	ETFB/DECR2/ABCB11/ADH4	4	0.0344827586206897
BP	GO:0009206	purine ribonucleoside triphosphate biosynthetic process	4/51	117/18903	0.00027830307477736	0.00355416218413587	0.00235886268424232	ATP5MC1/NDUFB7/NDUFA7/NME3	4	0.0341880341880342
BP	GO:0009145	purine nucleoside triphosphate biosynthetic process	4/51	118/18903	0.000287497687765585	0.00363293676315619	0.00241114460197453	ATP5MC1/NDUFB7/NDUFA7/NME3	4	0.0338983050847458
BP	GO:0048545	response to steroid hormone	6/51	339/18903	0.000290397881557347	0.00363293676315619	0.00241114460197453	LCAT/CYP1B1/APOA2/PTGS2/TH/SRD5A2	6	0.0176991150442478
BP	GO:0009152	purine ribonucleotide biosynthetic process	5/51	220/18903	0.000310042462168671	0.00377017262643484	0.00250222670235609	ATP5MC1/APRT/NDUFB7/NDUFA7/NME3	5	0.0227272727272727
BP	GO:0030301	cholesterol transport	4/51	121/18903	0.000316390957352671	0.00377017262643484	0.00250222670235609	LCAT/APOA2/LIPG/APOA1	4	0.0330578512396694
BP	GO:0032355	response to estradiol	4/51	121/18903	0.000316390957352671	0.00377017262643484	0.00250222670235609	CYP1B1/PTGS2/CYP19A1/TH	4	0.0330578512396694
BP	GO:0030300	regulation of intestinal cholesterol absorption	2/51	10/18903	0.000316743703525929	0.00377017262643484	0.00250222670235609	APOA2/APOA1	2	0.2
BP	GO:1905918	regulation of CoA-transferase activity	2/51	10/18903	0.000316743703525929	0.00377017262643484	0.00250222670235609	APOA2/APOA1	2	0.2
BP	GO:0022904	respiratory electron transport chain	4/51	122/18903	0.00032646846492867	0.00384856094233221	0.00255425226103099	NDUFB7/ETFB/NDUFA7/COX4I2	4	0.0327868852459016
BP	GO:0009201	ribonucleoside triphosphate biosynthetic process	4/51	123/18903	0.000336774172281448	0.00393223938301957	0.00260978882379508	ATP5MC1/NDUFB7/NDUFA7/NME3	4	0.032520325203252
BP	GO:0072329	monocarboxylic acid catabolic process	4/51	126/18903	0.000369090594927839	0.00426891574888237	0.00283323763534479	ETFB/DECR2/CYP4F3/ABCB11	4	0.0317460317460317
BP	GO:1904729	regulation of intestinal lipid absorption	2/51	11/18903	0.000386463061219994	0.00442807208463283	0.00293886813893808	APOA2/APOA1	2	0.181818181818182
BP	GO:0034381	plasma lipoprotein particle clearance	3/51	53/18903	0.000394092147891587	0.00447367567884338	0.00296913479844246	APOA2/LIPG/APOA1	3	0.0566037735849057
BP	GO:0009260	ribonucleotide biosynthetic process	5/51	234/18903	0.000411418376993867	0.00462751312105028	0.00307123520440617	ATP5MC1/APRT/NDUFB7/NDUFA7/NME3	5	0.0213675213675214
BP	GO:0009142	nucleoside triphosphate biosynthetic process	4/51	134/18903	0.000466063148794427	0.00515775974847228	0.00342315470556287	ATP5MC1/NDUFB7/NDUFA7/NME3	4	0.0298507462686567
BP	GO:0046390	ribose phosphate biosynthetic process	5/51	241/18903	0.000470637789374891	0.00515775974847228	0.00342315470556287	ATP5MC1/APRT/NDUFB7/NDUFA7/NME3	5	0.020746887966805
BP	GO:0015711	organic anion transport	6/51	372/18903	0.000475880400913969	0.00515775974847228	0.00342315470556287	LRP2/PLA2G1B/PLA2G2A/PTGS2/ABCB11/PLA2G2D	6	0.0161290322580645
BP	GO:0015918	sterol transport	4/51	135/18903	0.00047934378378889	0.00515775974847228	0.00342315470556287	LCAT/APOA2/LIPG/APOA1	4	0.0296296296296296
BP	GO:0006164	purine nucleotide biosynthetic process	5/51	242/18903	0.000479595930934617	0.00515775974847228	0.00342315470556287	ATP5MC1/APRT/NDUFB7/NDUFA7/NME3	5	0.0206611570247934
BP	GO:0009161	ribonucleoside monophosphate metabolic process	3/51	59/18903	0.000540701840468285	0.00571260002746592	0.00379139677275792	APRT/NT5C1A/DPYS	3	0.0508474576271186
BP	GO:0033700	phospholipid efflux	2/51	13/18903	0.000546185228768119	0.00571260002746592	0.00379139677275792	APOA2/APOA1	2	0.153846153846154
BP	GO:1904478	regulation of intestinal absorption	2/51	13/18903	0.000546185228768119	0.00571260002746592	0.00379139677275792	APOA2/APOA1	2	0.153846153846154
BP	GO:0042157	lipoprotein metabolic process	4/51	140/18903	0.000549826103785464	0.00571260002746592	0.00379139677275792	LCAT/APOA2/LIPG/APOA1	4	0.0285714285714286
BP	GO:0009636	response to toxic substance	5/51	250/18903	0.00055597357214388	0.00572792940712938	0.00380157073212931	CYP1B1/PTGS2/ADH4/TPO/TH	5	0.02
BP	GO:0072522	purine-containing compound biosynthetic process	5/51	251/18903	0.000566127962316232	0.00578394068166418	0.00383874486728463	ATP5MC1/APRT/NDUFB7/NDUFA7/NME3	5	0.0199203187250996
BP	GO:0009158	ribonucleoside monophosphate catabolic process	2/51	14/18903	0.000636116945533948	0.00628934980019855	0.00417417995668711	NT5C1A/DPYS	2	0.142857142857143
BP	GO:0009159	deoxyribonucleoside monophosphate catabolic process	2/51	14/18903	0.000636116945533948	0.00628934980019855	0.00417417995668711	NT5C1A/DPYS	2	0.142857142857143
BP	GO:0018158	protein oxidation	2/51	14/18903	0.000636116945533948	0.00628934980019855	0.00417417995668711	APOA2/APOA1	2	0.142857142857143
BP	GO:0018206	peptidyl-methionine modification	2/51	14/18903	0.000636116945533948	0.00628934980019855	0.00417417995668711	APOA2/APOA1	2	0.142857142857143
BP	GO:0050994	regulation of lipid catabolic process	3/51	63/18903	0.00065549532956478	0.00642909819237137	0.00426692959792485	APOA2/ABCB11/APOA1	3	0.0476190476190476
BP	GO:0015909	long-chain fatty acid transport	3/51	67/18903	0.000784775344751861	0.00758869943119406	0.005036545599994	PLA2G1B/PLA2G2A/PLA2G2D	3	0.0447761194029851
BP	GO:0007584	response to nutrient	4/51	154/18903	0.000786105079740331	0.00758869943119406	0.005036545599994	CYP1B1/LIPG/PTGS2/OTC	4	0.025974025974026
BP	GO:0032368	regulation of lipid transport	4/51	155/18903	0.000805333966160743	0.00771358939463336	0.00511943384738696	APOA2/LIPG/APOA1/CYP19A1	4	0.0258064516129032
BP	GO:0034374	low-density lipoprotein particle remodeling	2/51	16/18903	0.000835944932272453	0.00794471695322502	0.00527283094774873	APOA2/PLA2G2A	2	0.125
BP	GO:0009404	toxin metabolic process	2/51	17/18903	0.000945770923213597	0.008919347321999	0.00591968359226	CYP1B1/TH	2	0.117647058823529
BP	GO:0006665	sphingolipid metabolic process	4/51	163/18903	0.000971323337935853	0.00909040009396455	0.00603320964422993	DEGS2/SGMS2/SGPP2/TH	4	0.0245398773006135
BP	GO:0009125	nucleoside monophosphate catabolic process	2/51	18/18903	0.00106215828439745	0.00971795564680054	0.0064497121275666	NT5C1A/DPYS	2	0.111111111111111
BP	GO:0032354	response to follicle-stimulating hormone	2/51	18/18903	0.00106215828439745	0.00971795564680054	0.0064497121275666	CYP1B1/SRD5A2	2	0.111111111111111
BP	GO:0046040	IMP metabolic process	2/51	18/18903	0.00106215828439745	0.00971795564680054	0.0064497121275666	APRT/NT5C1A	2	0.111111111111111
BP	GO:0006635	fatty acid beta-oxidation	3/51	76/18903	0.0011321711400866	0.0102061898363689	0.00677374838457385	ETFB/DECR2/ABCB11	3	0.0394736842105263
BP	GO:0015986	proton motive force-driven ATP synthesis	3/51	76/18903	0.0011321711400866	0.0102061898363689	0.00677374838457385	ATP5MC1/NDUFB7/NDUFA7	3	0.0394736842105263
BP	GO:0048732	gland development	6/51	441/18903	0.00115461811513614	0.0103325679500504	0.00685762430272944	APRT/CYP1B1/APOA1/OTC/CYP19A1/UGT1A9	6	0.0136054421768707
BP	GO:0030299	intestinal cholesterol absorption	2/51	19/18903	0.00118507221245944	0.0105282502353281	0.00698749672182416	APOA2/APOA1	2	0.105263157894737
BP	GO:0009150	purine ribonucleotide metabolic process	6/51	447/18903	0.00123746144795806	0.010914588022997	0.00724390533337055	ATP5MC1/APRT/NDUFB7/NDUFA7/NME3/NT5C1A	6	0.0134228187919463
BP	GO:0009165	nucleotide biosynthetic process	5/51	304/18903	0.00133490245598481	0.0116694191908085	0.00774487939769463	ATP5MC1/APRT/NDUFB7/NDUFA7/NME3	5	0.0164473684210526
BP	GO:0032371	regulation of sterol transport	3/51	81/18903	0.00136111496271257	0.0116694191908085	0.00774487939769463	APOA2/LIPG/APOA1	3	0.037037037037037
BP	GO:0032374	regulation of cholesterol transport	3/51	81/18903	0.00136111496271257	0.0116694191908085	0.00774487939769463	APOA2/LIPG/APOA1	3	0.037037037037037
BP	GO:1901657	glycosyl compound metabolic process	3/51	81/18903	0.00136111496271257	0.0116694191908085	0.00774487939769463	APRT/NT5C1A/TH	3	0.037037037037037
BP	GO:0071466	cellular response to xenobiotic stimulus	4/51	183/18903	0.00148942052007936	0.0126807608167868	0.0084160969446005	CYP1B1/ABCB11/TH/UGT1A9	4	0.0218579234972678
BP	GO:1901292	nucleoside phosphate catabolic process	3/51	85/18903	0.00156379613852989	0.0131044372566648	0.00869728685447058	NT5C1A/DPYS/ENTPD8	3	0.0352941176470588
BP	GO:0009713	catechol-containing compound biosynthetic process	2/51	22/18903	0.0015926273664299	0.0131044372566648	0.00869728685447058	PNMT/TH	2	0.0909090909090909
BP	GO:0010042	response to manganese ion	2/51	22/18903	0.0015926273664299	0.0131044372566648	0.00869728685447058	PTGS2/TH	2	0.0909090909090909
BP	GO:0042423	catecholamine biosynthetic process	2/51	22/18903	0.0015926273664299	0.0131044372566648	0.00869728685447058	PNMT/TH	2	0.0909090909090909
BP	GO:0046128	purine ribonucleoside metabolic process	2/51	22/18903	0.0015926273664299	0.0131044372566648	0.00869728685447058	APRT/NT5C1A	2	0.0909090909090909
BP	GO:0031667	response to nutrient levels	6/51	474/18903	0.00166822844987612	0.0136349871969875	0.00904940766143326	CYP1B1/LIPG/PTGS2/OTC/TH/SRD5A2	6	0.0126582278481013
BP	GO:0006163	purine nucleotide metabolic process	6/51	476/18903	0.0017041680582179	0.013684849300139	0.00908250065167638	ATP5MC1/APRT/NDUFB7/NDUFA7/NME3/NT5C1A	6	0.0126050420168067
BP	GO:0032370	positive regulation of lipid transport	3/51	88/18903	0.00172758069769759	0.013684849300139	0.00908250065167638	LIPG/APOA1/CYP19A1	3	0.0340909090909091
BP	GO:0044241	lipid digestion	2/51	23/18903	0.00174130219479746	0.013684849300139	0.00908250065167638	APOA2/APOA1	2	0.0869565217391304
BP	GO:0045723	positive regulation of fatty acid biosynthetic process	2/51	23/18903	0.00174130219479746	0.013684849300139	0.00908250065167638	PTGS2/APOA1	2	0.0869565217391304
BP	GO:0046519	sphingoid metabolic process	2/51	23/18903	0.00174130219479746	0.013684849300139	0.00908250065167638	DEGS2/SGPP2	2	0.0869565217391304
BP	GO:0098856	intestinal lipid absorption	2/51	23/18903	0.00174130219479746	0.013684849300139	0.00908250065167638	APOA2/APOA1	2	0.0869565217391304
BP	GO:0015849	organic acid transport	5/51	324/18903	0.00176668614481532	0.0137959058187489	0.00915620777701806	LRP2/PLA2G1B/PLA2G2A/ABCB11/PLA2G2D	5	0.0154320987654321
BP	GO:0060191	regulation of lipase activity	3/51	90/18903	0.00184250902625249	0.0142969371277566	0.00948873735704979	APOA2/PLA2G1B/APOA1	3	0.0333333333333333
BP	GO:0120255	olefinic compound biosynthetic process	2/51	24/18903	0.00189633156916852	0.01462202832579	0.00970449720600639	CYP19A1/SRD5A2	2	0.0833333333333333
BP	GO:0019646	aerobic electron transport chain	3/51	93/18903	0.0020236801753043	0.0154767944556491	0.0102717971273433	NDUFB7/NDUFA7/COX4I2	3	0.032258064516129
BP	GO:0008211	glucocorticoid metabolic process	2/51	25/18903	0.00205768148146069	0.0154767944556491	0.0102717971273433	CYP21A2/APOA1	2	0.08
BP	GO:0009162	deoxyribonucleoside monophosphate metabolic process	2/51	25/18903	0.00205768148146069	0.0154767944556491	0.0102717971273433	NT5C1A/DPYS	2	0.08
BP	GO:0046033	AMP metabolic process	2/51	25/18903	0.00205768148146069	0.0154767944556491	0.0102717971273433	APRT/NT5C1A	2	0.08
BP	GO:0019217	regulation of fatty acid metabolic process	3/51	96/18903	0.00221558471015938	0.0164351803309346	0.0109078684603868	PTGS2/ABCB11/APOA1	3	0.03125
BP	GO:0006706	steroid catabolic process	2/51	26/18903	0.00222531805459637	0.0164351803309346	0.0109078684603868	CYP19A1/SRD5A2	2	0.0769230769230769
BP	GO:0046339	diacylglycerol metabolic process	2/51	26/18903	0.00222531805459637	0.0164351803309346	0.0109078684603868	APOA2/DGKB	2	0.0769230769230769
BP	GO:0006576	cellular biogenic amine metabolic process	3/51	97/18903	0.00228197585795344	0.0167527089931193	0.0111186091282572	GDPD3/PNMT/TH	3	0.0309278350515464
BP	GO:0001963	synaptic transmission, dopaminergic	2/51	27/18903	0.0023992075420657	0.0173025202739562	0.0114835134985559	PTGS2/TH	2	0.0740740740740741
BP	GO:0030325	adrenal gland development	2/51	27/18903	0.0023992075420657	0.0173025202739562	0.0114835134985559	CYP1B1/APOA1	2	0.0740740740740741
BP	GO:0042278	purine nucleoside metabolic process	2/51	27/18903	0.0023992075420657	0.0173025202739562	0.0114835134985559	APRT/NT5C1A	2	0.0740740740740741
BP	GO:0009062	fatty acid catabolic process	3/51	101/18903	0.00255986479617725	0.0180367485063983	0.0119708135961586	ETFB/DECR2/ABCB11	3	0.0297029702970297
BP	GO:0015908	fatty acid transport	3/51	101/18903	0.00255986479617725	0.0180367485063983	0.0119708135961586	PLA2G1B/PLA2G2A/PLA2G2D	3	0.0297029702970297
BP	GO:0042773	ATP synthesis coupled electron transport	3/51	101/18903	0.00255986479617725	0.0180367485063983	0.0119708135961586	NDUFB7/NDUFA7/COX4I2	3	0.0297029702970297
BP	GO:0042775	mitochondrial ATP synthesis coupled electron transport	3/51	101/18903	0.00255986479617725	0.0180367485063983	0.0119708135961586	NDUFB7/NDUFA7/COX4I2	3	0.0297029702970297
BP	GO:0050996	positive regulation of lipid catabolic process	2/51	28/18903	0.00257931632749082	0.0180699532428785	0.01199285125504	APOA2/APOA1	2	0.0714285714285714
BP	GO:0009264	deoxyribonucleotide catabolic process	2/51	29/18903	0.00276561092419147	0.0189421172796578	0.0125716979970597	NT5C1A/DPYS	2	0.0689655172413793
BP	GO:0010575	positive regulation of vascular endothelial growth factor production	2/51	29/18903	0.00276561092419147	0.0189421172796578	0.0125716979970597	CYP1B1/PTGS2	2	0.0689655172413793
BP	GO:0034698	response to gonadotropin	2/51	29/18903	0.00276561092419147	0.0189421172796578	0.0125716979970597	CYP1B1/SRD5A2	2	0.0689655172413793
BP	GO:0046386	deoxyribose phosphate catabolic process	2/51	29/18903	0.00276561092419147	0.0189421172796578	0.0125716979970597	NT5C1A/DPYS	2	0.0689655172413793
BP	GO:0006754	ATP biosynthetic process	3/51	106/18903	0.00293552424830216	0.019994181824547	0.0132699429470034	ATP5MC1/NDUFB7/NDUFA7	3	0.0283018867924528
BP	GO:0008209	androgen metabolic process	2/51	30/18903	0.00295805797475197	0.0200363484919664	0.0132979285518074	CYP19A1/SRD5A2	2	0.0666666666666667
BP	GO:0034308	primary alcohol metabolic process	3/51	108/18903	0.00309478005386102	0.0207333352242274	0.0137605118299371	GDPD3/CYP1B1/ADH4	3	0.0277777777777778
BP	GO:0044106	cellular amine metabolic process	3/51	108/18903	0.00309478005386102	0.0207333352242274	0.0137605118299371	GDPD3/PNMT/TH	3	0.0277777777777778
BP	GO:0009218	pyrimidine ribonucleotide metabolic process	2/51	31/18903	0.00315662425058941	0.0210327246262099	0.0139592136482015	NME3/DPYS	2	0.0645161290322581
BP	GO:0018958	phenol-containing compound metabolic process	3/51	111/18903	0.00334347410974023	0.021919814759402	0.014547966694443	PNMT/TPO/TH	3	0.027027027027027
BP	GO:0030148	sphingolipid biosynthetic process	3/51	111/18903	0.00334347410974023	0.021919814759402	0.014547966694443	DEGS2/SGMS2/SGPP2	3	0.027027027027027
BP	GO:0034389	lipid droplet organization	2/51	32/18903	0.00336127665152331	0.021919814759402	0.014547966694443	FITM1/CIDEC	2	0.0625
BP	GO:0046856	phosphatidylinositol dephosphorylation	2/51	32/18903	0.00336127665152331	0.021919814759402	0.014547966694443	MTMR8/TPTE	2	0.0625
BP	GO:0008406	gonad development	4/51	233/18903	0.00357168114577133	0.0230486851776566	0.0152971869514283	CYP1B1/LRP2/CYP19A1/SRD5A2	4	0.0171673819742489
BP	GO:0006654	phosphatidic acid biosynthetic process	2/51	33/18903	0.00357198220534645	0.0230486851776566	0.0152971869514283	DGKB/LIPI	2	0.0606060606060606
BP	GO:0002526	acute inflammatory response	3/51	114/18903	0.00360410328418917	0.0231341917613399	0.0153539368348208	APOA2/PTGS2/PLA2G2D	3	0.0263157894736842
BP	GO:1990748	cellular detoxification	3/51	115/18903	0.00369366272679349	0.0235855755367126	0.0156535158322992	PTGS2/ADH4/TPO	3	0.0260869565217391
BP	GO:0009112	nucleobase metabolic process	2/51	34/18903	0.00378870806739711	0.0239430726321075	0.0158907831584263	APRT/DPYS	2	0.0588235294117647
BP	GO:0046475	glycerophospholipid catabolic process	2/51	34/18903	0.00378870806739711	0.0239430726321075	0.0158907831584263	GDPD3/PLA2G4E	2	0.0588235294117647
BP	GO:0045137	development of primary sexual characteristics	4/51	238/18903	0.00385225151336894	0.0242197966943093	0.0160744422123303	CYP1B1/LRP2/CYP19A1/SRD5A2	4	0.0168067226890756
BP	GO:0009308	amine metabolic process	3/51	117/18903	0.00387684473304391	0.024250059401591	0.0160945272752038	GDPD3/PNMT/TH	3	0.0256410256410256
BP	GO:0045333	cellular respiration	4/51	240/18903	0.00396855520401859	0.0244613483654968	0.016234757694281	NDUFB7/ETFB/NDUFA7/COX4I2	4	0.0166666666666667
BP	GO:0006805	xenobiotic metabolic process	3/51	118/18903	0.00397047987335552	0.0244613483654968	0.016234757694281	CYP1B1/ABCB11/UGT1A9	3	0.0254237288135593
BP	GO:0019751	polyol metabolic process	3/51	118/18903	0.00397047987335552	0.0244613483654968	0.016234757694281	LRP2/DEGS2/SGPP2	3	0.0254237288135593
BP	GO:0002719	negative regulation of cytokine production involved in immune response	2/51	35/18903	0.00401142152013261	0.0244676755407094	0.0162389569785939	APOA2/APOA1	2	0.0571428571428571
BP	GO:0006691	leukotriene metabolic process	2/51	35/18903	0.00401142152013261	0.0244676755407094	0.0162389569785939	CYP4F3/PLA2G1B	2	0.0571428571428571
BP	GO:0009205	purine ribonucleoside triphosphate metabolic process	4/51	242/18903	0.00408722196727532	0.024806604613265	0.0164639008895457	ATP5MC1/NDUFB7/NDUFA7/NME3	4	0.0165289256198347
BP	GO:0009119	ribonucleoside metabolic process	2/51	36/18903	0.00424008997270407	0.0254821093457608	0.0169122267745111	APRT/NT5C1A	2	0.0555555555555556
BP	GO:0046471	phosphatidylglycerol metabolic process	2/51	36/18903	0.00424008997270407	0.0254821093457608	0.0169122267745111	PLA2G1B/PLA2G2D	2	0.0555555555555556
BP	GO:0009144	purine nucleoside triphosphate metabolic process	4/51	247/18903	0.00439437543559096	0.0262805087026074	0.0174421166198296	ATP5MC1/NDUFB7/NDUFA7/NME3	4	0.0161943319838057
BP	GO:0030282	bone mineralization	3/51	123/18903	0.0044593415938559	0.0264113661549146	0.0175289654312261	SGMS2/PHOSPHO1/PTGS2	3	0.024390243902439
BP	GO:0097237	cellular response to toxic substance	3/51	123/18903	0.0044593415938559	0.0264113661549146	0.0175289654312261	PTGS2/ADH4/TPO	3	0.024390243902439
BP	GO:0009199	ribonucleoside triphosphate metabolic process	4/51	249/18903	0.00452149021994653	0.0266507067771848	0.0176878134616329	ATP5MC1/NDUFB7/NDUFA7/NME3	4	0.0160642570281124
BP	GO:0046660	female sex differentiation	3/51	124/18903	0.00456129276347665	0.0267566742967578	0.0177581430680809	LRP2/CYP19A1/SRD5A2	3	0.0241935483870968
BP	GO:0008210	estrogen metabolic process	2/51	39/18903	0.00496150131246092	0.0284243019115752	0.0188649312077339	CYP1B1/CYP19A1	2	0.0512820512820513
BP	GO:0032373	positive regulation of sterol transport	2/51	39/18903	0.00496150131246092	0.0284243019115752	0.0188649312077339	LIPG/APOA1	2	0.0512820512820513
BP	GO:0032376	positive regulation of cholesterol transport	2/51	39/18903	0.00496150131246092	0.0284243019115752	0.0188649312077339	LIPG/APOA1	2	0.0512820512820513
BP	GO:0042401	cellular biogenic amine biosynthetic process	2/51	39/18903	0.00496150131246092	0.0284243019115752	0.0188649312077339	PNMT/TH	2	0.0512820512820513
BP	GO:1901661	quinone metabolic process	2/51	39/18903	0.00496150131246092	0.0284243019115752	0.0188649312077339	CYP4F3/ADH4	2	0.0512820512820513
BP	GO:0050727	regulation of inflammatory response	5/51	414/18903	0.00505318911106387	0.0288149295356479	0.0191241869417497	PLA2G2A/PTGS2/APOA1/PLA2G2D/CYP19A1	5	0.0120772946859903
BP	GO:0009309	amine biosynthetic process	2/51	40/18903	0.00521366637495598	0.0294560137128849	0.0195496682408002	PNMT/TH	2	0.05
BP	GO:0045923	positive regulation of fatty acid metabolic process	2/51	40/18903	0.00521366637495598	0.0294560137128849	0.0195496682408002	PTGS2/APOA1	2	0.05
BP	GO:0009167	purine ribonucleoside monophosphate metabolic process	2/51	42/18903	0.00573534645403087	0.0321074646239354	0.0213094102810183	APRT/NT5C1A	2	0.0476190476190476
BP	GO:0050892	intestinal absorption	2/51	42/18903	0.00573534645403087	0.0321074646239354	0.0213094102810183	APOA2/APOA1	2	0.0476190476190476
BP	GO:0009141	nucleoside triphosphate metabolic process	4/51	267/18903	0.00577900734727933	0.0322048318534748	0.0213740319590762	ATP5MC1/NDUFB7/NDUFA7/NME3	4	0.0149812734082397
BP	GO:0010565	regulation of cellular ketone metabolic process	3/51	136/18903	0.00589597476292055	0.0327079866938489	0.021707970906109	PTGS2/ABCB11/APOA1	3	0.0220588235294118
BP	GO:0009124	nucleoside monophosphate biosynthetic process	2/51	43/18903	0.00600479791528065	0.0331616317303337	0.0220090506804739	APRT/ENTPD8	2	0.0465116279069767
BP	GO:0008203	cholesterol metabolic process	3/51	139/18903	0.00626236782044753	0.0339172530577581	0.0225105491660058	LCAT/APOA2/APOA1	3	0.0215827338129496
BP	GO:0009126	purine nucleoside monophosphate metabolic process	2/51	44/18903	0.0062799481599601	0.0339172530577581	0.0225105491660058	APRT/NT5C1A	2	0.0454545454545455
BP	GO:0009394	2'-deoxyribonucleotide metabolic process	2/51	44/18903	0.0062799481599601	0.0339172530577581	0.0225105491660058	NT5C1A/DPYS	2	0.0454545454545455
BP	GO:0042181	ketone biosynthetic process	2/51	44/18903	0.0062799481599601	0.0339172530577581	0.0225105491660058	CYP19A1/SRD5A2	2	0.0454545454545455
BP	GO:0044058	regulation of digestive system process	2/51	44/18903	0.0062799481599601	0.0339172530577581	0.0225105491660058	APOA2/APOA1	2	0.0454545454545455
BP	GO:0006775	fat-soluble vitamin metabolic process	2/51	45/18903	0.00656076571854543	0.0349717337866813	0.0232103977136642	LRP2/CYP4F3	2	0.0444444444444444
BP	GO:0009262	deoxyribonucleotide metabolic process	2/51	45/18903	0.00656076571854543	0.0349717337866813	0.0232103977136642	NT5C1A/DPYS	2	0.0444444444444444
BP	GO:0019692	deoxyribose phosphate metabolic process	2/51	45/18903	0.00656076571854543	0.0349717337866813	0.0232103977136642	NT5C1A/DPYS	2	0.0444444444444444
BP	GO:0002701	negative regulation of production of molecular mediator of immune response	2/51	47/18903	0.00713927751149246	0.0375654687943766	0.024931834273249	APOA2/APOA1	2	0.0425531914893617
BP	GO:0051180	vitamin transport	2/51	47/18903	0.00713927751149246	0.0375654687943766	0.024931834273249	LRP2/APOA1	2	0.0425531914893617
BP	GO:0140353	lipid export from cell	2/51	47/18903	0.00713927751149246	0.0375654687943766	0.024931834273249	PTGS2/CYP19A1	2	0.0425531914893617
BP	GO:0006119	oxidative phosphorylation	3/51	147/18903	0.00730502558904047	0.0381104739241005	0.025293548848055	NDUFB7/NDUFA7/COX4I2	3	0.0204081632653061
BP	GO:0008584	male gonad development	3/51	147/18903	0.00730502558904047	0.0381104739241005	0.025293548848055	CYP1B1/LRP2/SRD5A2	3	0.0204081632653061
BP	GO:0002673	regulation of acute inflammatory response	2/51	48/18903	0.00743690941772864	0.0383364376847197	0.025443518786201	PTGS2/PLA2G2D	2	0.0416666666666667
BP	GO:0046189	phenol-containing compound biosynthetic process	2/51	48/18903	0.00743690941772864	0.0383364376847197	0.025443518786201	PNMT/TH	2	0.0416666666666667
BP	GO:0046546	development of primary male sexual characteristics	3/51	148/18903	0.00744214695674004	0.0383364376847197	0.025443518786201	CYP1B1/LRP2/SRD5A2	3	0.0202702702702703
BP	GO:0007548	sex differentiation	4/51	288/18903	0.00751903388164916	0.038564521621008	0.0255948958642047	CYP1B1/LRP2/CYP19A1/SRD5A2	4	0.0138888888888889
BP	GO:0046467	membrane lipid biosynthetic process	3/51	149/18903	0.00758079095486373	0.038564521621008	0.0255948958642047	DEGS2/SGMS2/SGPP2	3	0.0201342281879195
BP	GO:1902652	secondary alcohol metabolic process	3/51	149/18903	0.00758079095486373	0.038564521621008	0.0255948958642047	LCAT/APOA2/APOA1	3	0.0201342281879195
BP	GO:0009261	ribonucleotide catabolic process	2/51	49/18903	0.00774008398080128	0.0392121609936462	0.0260247277823375	NT5C1A/DPYS	2	0.0408163265306122
BP	GO:0042304	regulation of fatty acid biosynthetic process	2/51	50/18903	0.00804877033965358	0.0404417722803905	0.0268408087685601	PTGS2/APOA1	2	0.04
BP	GO:0120009	intermembrane lipid transfer	2/51	50/18903	0.00804877033965358	0.0404417722803905	0.0268408087685601	APOA2/APOA1	2	0.04
BP	GO:0045834	positive regulation of lipid metabolic process	3/51	154/18903	0.00829698823591285	0.0413500308017445	0.0274436110670117	APOA2/PTGS2/APOA1	3	0.0194805194805195
BP	GO:0098754	detoxification	3/51	154/18903	0.00829698823591285	0.0413500308017445	0.0274436110670117	PTGS2/ADH4/TPO	3	0.0194805194805195
BP	GO:0006120	mitochondrial electron transport, NADH to ubiquinone	2/51	51/18903	0.00836293775369902	0.0415099663402226	0.0275497587198352	NDUFB7/NDUFA7	2	0.0392156862745098
BP	GO:0006220	pyrimidine nucleotide metabolic process	2/51	52/18903	0.00868255560241653	0.0425792526742507	0.0282594336028125	NME3/DPYS	2	0.0384615384615385
BP	GO:0006636	unsaturated fatty acid biosynthetic process	2/51	52/18903	0.00868255560241653	0.0425792526742507	0.0282594336028125	DECR2/PTGS2	2	0.0384615384615385
BP	GO:0010043	response to zinc ion	2/51	52/18903	0.00868255560241653	0.0425792526742507	0.0282594336028125	OTC/TH	2	0.0384615384615385
BP	GO:0048608	reproductive structure development	4/51	306/18903	0.00926102174924974	0.0452351102174509	0.0300221002816945	CYP1B1/LRP2/CYP19A1/SRD5A2	4	0.0130718954248366
BP	GO:0042572	retinol metabolic process	2/51	54/18903	0.0093380207196906	0.0454302119140503	0.0301515873697612	CYP1B1/ADH4	2	0.037037037037037
BP	GO:0046488	phosphatidylinositol metabolic process	3/51	162/18903	0.0095234571762085	0.0461492430752238	0.0306288013197802	MTMR8/PLA2G4E/TPTE	3	0.0185185185185185
BP	GO:0006584	catecholamine metabolic process	2/51	55/18903	0.00967380734390649	0.0463629429884566	0.0307706318623482	PNMT/TH	2	0.0363636363636364
BP	GO:0009712	catechol-containing compound metabolic process	2/51	55/18903	0.00967380734390649	0.0463629429884566	0.0307706318623482	PNMT/TH	2	0.0363636363636364
BP	GO:0061458	reproductive system development	4/51	310/18903	0.00968100604000399	0.0463629429884566	0.0307706318623482	CYP1B1/LRP2/CYP19A1/SRD5A2	4	0.0129032258064516
BP	GO:0009116	nucleoside metabolic process	2/51	56/18903	0.0100149231133121	0.0477754697934654	0.0317081120892494	APRT/NT5C1A	2	0.0357142857142857
BP	GO:0046661	male sex differentiation	3/51	171/18903	0.0110236223624845	0.0523835698310309	0.0347664630199939	CYP1B1/LRP2/SRD5A2	3	0.0175438596491228
BP	GO:0010574	regulation of vascular endothelial growth factor production	2/51	59/18903	0.0110699456183601	0.0524005920004228	0.0347777604673537	CYP1B1/PTGS2	2	0.0338983050847458
BP	GO:0019748	secondary metabolic process	2/51	60/18903	0.0114320788809471	0.0539066488770813	0.0357773156881462	CYP1B1/TH	2	0.0333333333333333
BP	GO:0031214	biomineral tissue development	3/51	174/18903	0.0115523621288552	0.0542651186589137	0.0360152285767496	SGMS2/PHOSPHO1/PTGS2	3	0.0172413793103448
BP	GO:0046456	icosanoid biosynthetic process	2/51	61/18903	0.0117993923302823	0.0552139503699469	0.0366449589044122	PLA2G1B/PTGS2	2	0.0327868852459016
BP	GO:0043534	blood vessel endothelial cell migration	3/51	177/18903	0.0120955638272454	0.0563846435444974	0.0374219365157521	CYP1B1/PTGS2/APOA1	3	0.0169491525423729
BP	GO:0015980	energy derivation by oxidation of organic compounds	4/51	333/18903	0.0123379173700461	0.0572965405139264	0.0380271536166095	NDUFB7/ETFB/NDUFA7/COX4I2	4	0.012012012012012
BP	GO:0010573	vascular endothelial growth factor production	2/51	63/18903	0.0125494421374558	0.057840661881657	0.0383882816472232	CYP1B1/PTGS2	2	0.0317460317460317
BP	GO:0032757	positive regulation of interleukin-8 production	2/51	63/18903	0.0125494421374558	0.057840661881657	0.0383882816472232	APOA2/PLA2G1B	2	0.0317460317460317
BP	GO:0110148	biomineralization	3/51	181/18903	0.0128424408847639	0.0589694102049456	0.0391374208709736	SGMS2/PHOSPHO1/PTGS2	3	0.0165745856353591
BP	GO:0042776	proton motive force-driven mitochondrial ATP synthesis	2/51	67/18903	0.0141104162806683	0.0645498894033559	0.0428411303415421	NDUFB7/NDUFA7	2	0.0298507462686567
BP	GO:0019216	regulation of lipid metabolic process	4/51	347/18903	0.014164031550756	0.064554285060323	0.0428440476960845	APOA2/PTGS2/ABCB11/APOA1	4	0.0115273775216138
BP	GO:0046513	ceramide biosynthetic process	2/51	68/18903	0.0145131731168091	0.0656573809638668	0.0435761616597142	DEGS2/SGMS2	2	0.0294117647058824
BP	GO:0060193	positive regulation of lipase activity	2/51	68/18903	0.0145131731168091	0.0656573809638668	0.0435761616597142	PLA2G1B/APOA1	2	0.0294117647058824
BP	GO:0006081	cellular aldehyde metabolic process	2/51	70/18903	0.015333501870556	0.0688603417337058	0.0457019353998065	CYP1B1/ADH4	2	0.0285714285714286
BP	GO:0043627	response to estrogen	2/51	70/18903	0.015333501870556	0.0688603417337058	0.0457019353998065	APOA2/ABCB11	2	0.0285714285714286
BP	GO:0009060	aerobic respiration	3/51	194/18903	0.015449774200323	0.0691292816408615	0.0458804281861303	NDUFB7/NDUFA7/COX4I2	3	0.0154639175257732
BP	GO:0033344	cholesterol efflux	2/51	71/18903	0.0157510168464402	0.0702208969226753	0.0466049225733906	APOA2/APOA1	2	0.028169014084507
BP	GO:0010038	response to metal ion	4/51	360/18903	0.0160065556728767	0.0711015842570539	0.0471894261446748	LCAT/PTGS2/OTC/TH	4	0.0111111111111111
BP	GO:0009746	response to hexose	3/51	199/18903	0.0165264752886187	0.0731460603026949	0.0485463249025356	APOA2/PTGS2/TH	3	0.0150753768844221
BP	GO:0050766	positive regulation of phagocytosis	2/51	74/18903	0.0170326248765521	0.075115101074291	0.0498531580067201	APOA2/APOA1	2	0.027027027027027
BP	GO:1901654	response to ketone	3/51	205/18903	0.017873072251362	0.0781453663881213	0.0518643154615075	CYP1B1/TH/SRD5A2	3	0.0146341463414634
BP	GO:0006809	nitric oxide biosynthetic process	2/51	76/18903	0.0179109689682399	0.0781453663881213	0.0518643154615075	CYP1B1/PTGS2	2	0.0263157894736842
BP	GO:0009166	nucleotide catabolic process	2/51	76/18903	0.0179109689682399	0.0781453663881213	0.0518643154615075	NT5C1A/DPYS	2	0.0263157894736842
BP	GO:0034284	response to monosaccharide	3/51	207/18903	0.0183352022950716	0.0795264137520453	0.0527809030912089	APOA2/PTGS2/TH	3	0.0144927536231884
BP	GO:1901616	organic hydroxy compound catabolic process	2/51	77/18903	0.0183572390634819	0.0795264137520453	0.0527809030912089	CYP4F3/ADH4	2	0.025974025974026
BP	GO:1901568	fatty acid derivative metabolic process	2/51	78/18903	0.0188082043057936	0.0811931636581088	0.0538871087041454	CYP4F3/AWAT1	2	0.0256410256410256
BP	GO:0046209	nitric oxide metabolic process	2/51	82/18903	0.0206584678356348	0.0885569285541549	0.0587743674528734	CYP1B1/PTGS2	2	0.024390243902439
BP	GO:0072527	pyrimidine-containing compound metabolic process	2/51	82/18903	0.0206584678356348	0.0885569285541549	0.0587743674528734	NME3/DPYS	2	0.024390243902439
BP	GO:0046034	ATP metabolic process	3/51	217/18903	0.0207456445326958	0.0886207672372303	0.0588167365625303	ATP5MC1/NDUFB7/NDUFA7	3	0.0138248847926267
BP	GO:0030500	regulation of bone mineralization	2/51	83/18903	0.0211324980825366	0.0896485904816258	0.0594988927984002	SGMS2/PHOSPHO1	2	0.0240963855421687
BP	GO:2001057	reactive nitrogen species metabolic process	2/51	83/18903	0.0211324980825366	0.0896485904816258	0.0594988927984002	CYP1B1/PTGS2	2	0.0240963855421687
BP	GO:0006970	response to osmotic stress	2/51	86/18903	0.0225816711051881	0.0951378995703115	0.0631420935587283	PTGS2/TH	2	0.0232558139534884
BP	GO:0033273	response to vitamin	2/51	86/18903	0.0225816711051881	0.0951378995703115	0.0631420935587283	PTGS2/OTC	2	0.0232558139534884
BP	GO:0019915	lipid storage	2/51	87/18903	0.0230736669714048	0.0968777935169258	0.0642968441560777	FITM1/APOA1	2	0.0229885057471264
BP	GO:0046889	positive regulation of lipid biosynthetic process	2/51	88/18903	0.0235700875824213	0.0986243255155239	0.0654560003636129	PTGS2/APOA1	2	0.0227272727272727
BP	GO:0009743	response to carbohydrate	3/51	234/18903	0.0252261728032481	0.105100526197472	0.0697541914232384	APOA2/PTGS2/TH	3	0.0128205128205128
BP	GO:0000050	urea cycle	1/51	10/18903	0.0266609002018057	0.105100526197472	0.0697541914232384	OTC	1	0.1
BP	GO:0002361	CD4-positive, CD25-positive, alpha-beta regulatory T cell differentiation	1/51	10/18903	0.0266609002018057	0.105100526197472	0.0697541914232384	PLA2G2D	1	0.1
BP	GO:0002676	regulation of chronic inflammatory response	1/51	10/18903	0.0266609002018057	0.105100526197472	0.0697541914232384	CYP19A1	1	0.1
BP	GO:0006228	UTP biosynthetic process	1/51	10/18903	0.0266609002018057	0.105100526197472	0.0697541914232384	NME3	1	0.1
BP	GO:0006702	androgen biosynthetic process	1/51	10/18903	0.0266609002018057	0.105100526197472	0.0697541914232384	SRD5A2	1	0.1
BP	GO:0009113	purine nucleobase biosynthetic process	1/51	10/18903	0.0266609002018057	0.105100526197472	0.0697541914232384	APRT	1	0.1
BP	GO:0009128	purine nucleoside monophosphate catabolic process	1/51	10/18903	0.0266609002018057	0.105100526197472	0.0697541914232384	NT5C1A	1	0.1
BP	GO:0009155	purine deoxyribonucleotide catabolic process	1/51	10/18903	0.0266609002018057	0.105100526197472	0.0697541914232384	NT5C1A	1	0.1
BP	GO:0009169	purine ribonucleoside monophosphate catabolic process	1/51	10/18903	0.0266609002018057	0.105100526197472	0.0697541914232384	NT5C1A	1	0.1
BP	GO:0009170	purine deoxyribonucleoside monophosphate metabolic process	1/51	10/18903	0.0266609002018057	0.105100526197472	0.0697541914232384	NT5C1A	1	0.1
BP	GO:0032261	purine nucleotide salvage	1/51	10/18903	0.0266609002018057	0.105100526197472	0.0697541914232384	APRT	1	0.1
BP	GO:0046085	adenosine metabolic process	1/51	10/18903	0.0266609002018057	0.105100526197472	0.0697541914232384	NT5C1A	1	0.1
BP	GO:0051006	positive regulation of lipoprotein lipase activity	1/51	10/18903	0.0266609002018057	0.105100526197472	0.0697541914232384	APOA1	1	0.1
BP	GO:0060068	vagina development	1/51	10/18903	0.0266609002018057	0.105100526197472	0.0697541914232384	LRP2	1	0.1
BP	GO:0097267	omega-hydroxylase P450 pathway	1/51	10/18903	0.0266609002018057	0.105100526197472	0.0697541914232384	CYP1B1	1	0.1
BP	GO:1901523	icosanoid catabolic process	1/51	10/18903	0.0266609002018057	0.105100526197472	0.0697541914232384	CYP4F3	1	0.1
BP	GO:1905165	regulation of lysosomal protein catabolic process	1/51	10/18903	0.0266609002018057	0.105100526197472	0.0697541914232384	LRP2	1	0.1
BP	GO:0001660	fever generation	1/51	11/18903	0.0292883439158639	0.108691106833292	0.0721372246777151	PTGS2	1	0.0909090909090909
BP	GO:0003139	secondary heart field specification	1/51	11/18903	0.0292883439158639	0.108691106833292	0.0721372246777151	LRP2	1	0.0909090909090909
BP	GO:0006183	GTP biosynthetic process	1/51	11/18903	0.0292883439158639	0.108691106833292	0.0721372246777151	NME3	1	0.0909090909090909
BP	GO:0006188	IMP biosynthetic process	1/51	11/18903	0.0292883439158639	0.108691106833292	0.0721372246777151	APRT	1	0.0909090909090909
BP	GO:0006686	sphingomyelin biosynthetic process	1/51	11/18903	0.0292883439158639	0.108691106833292	0.0721372246777151	SGMS2	1	0.0909090909090909
BP	GO:0006703	estrogen biosynthetic process	1/51	11/18903	0.0292883439158639	0.108691106833292	0.0721372246777151	CYP19A1	1	0.0909090909090909
BP	GO:0007494	midgut development	1/51	11/18903	0.0292883439158639	0.108691106833292	0.0721372246777151	OTC	1	0.0909090909090909
BP	GO:0010986	positive regulation of lipoprotein particle clearance	1/51	11/18903	0.0292883439158639	0.108691106833292	0.0721372246777151	LIPG	1	0.0909090909090909
BP	GO:0032429	regulation of phospholipase A2 activity	1/51	11/18903	0.0292883439158639	0.108691106833292	0.0721372246777151	PLA2G1B	1	0.0909090909090909
BP	GO:0034115	negative regulation of heterotypic cell-cell adhesion	1/51	11/18903	0.0292883439158639	0.108691106833292	0.0721372246777151	APOA1	1	0.0909090909090909
BP	GO:0042451	purine nucleoside biosynthetic process	1/51	11/18903	0.0292883439158639	0.108691106833292	0.0721372246777151	APRT	1	0.0909090909090909
BP	GO:0042455	ribonucleoside biosynthetic process	1/51	11/18903	0.0292883439158639	0.108691106833292	0.0721372246777151	APRT	1	0.0909090909090909
BP	GO:0045472	response to ether	1/51	11/18903	0.0292883439158639	0.108691106833292	0.0721372246777151	TH	1	0.0909090909090909
BP	GO:0046129	purine ribonucleoside biosynthetic process	1/51	11/18903	0.0292883439158639	0.108691106833292	0.0721372246777151	APRT	1	0.0909090909090909
BP	GO:0061299	retina vasculature morphogenesis in camera-type eye	1/51	11/18903	0.0292883439158639	0.108691106833292	0.0721372246777151	CYP1B1	1	0.0909090909090909
BP	GO:0061365	positive regulation of triglyceride lipase activity	1/51	11/18903	0.0292883439158639	0.108691106833292	0.0721372246777151	APOA1	1	0.0909090909090909
BP	GO:0070587	regulation of cell-cell adhesion involved in gastrulation	1/51	11/18903	0.0292883439158639	0.108691106833292	0.0721372246777151	APOA1	1	0.0909090909090909
BP	GO:0106049	regulation of cellular response to osmotic stress	1/51	11/18903	0.0292883439158639	0.108691106833292	0.0721372246777151	PTGS2	1	0.0909090909090909
BP	GO:2000833	positive regulation of steroid hormone secretion	1/51	11/18903	0.0292883439158639	0.108691106833292	0.0721372246777151	CYP19A1	1	0.0909090909090909
BP	GO:0006979	response to oxidative stress	4/51	434/18903	0.0293448257437355	0.108691106833292	0.0721372246777151	CYP1B1/PTGS2/ABCB11/TPO	4	0.00921658986175115
BP	GO:0098869	cellular oxidant detoxification	2/51	100/18903	0.0298627415870818	0.110197831579837	0.0731372231572197	PTGS2/TPO	2	0.02
BP	GO:0042158	lipoprotein biosynthetic process	2/51	101/18903	0.0304143148555849	0.110197831579837	0.0731372231572197	LCAT/APOA1	2	0.0198019801980198
BP	GO:0097305	response to alcohol	3/51	253/18903	0.0308042550532822	0.110197831579837	0.0731372231572197	CYP1B1/ABCB11/TH	3	0.0118577075098814
BP	GO:0019218	regulation of steroid metabolic process	2/51	102/18903	0.030969952023933	0.110197831579837	0.0731372231572197	ABCB11/APOA1	2	0.0196078431372549
BP	GO:0034612	response to tumor necrosis factor	3/51	254/18903	0.0311144640238228	0.110197831579837	0.0731372231572197	CYP1B1/PTGS2/APOA1	3	0.0118110236220472
BP	GO:0032677	regulation of interleukin-8 production	2/51	103/18903	0.0315296280862702	0.110197831579837	0.0731372231572197	APOA2/PLA2G1B	2	0.0194174757281553
BP	GO:0050764	regulation of phagocytosis	2/51	103/18903	0.0315296280862702	0.110197831579837	0.0731372231572197	APOA2/APOA1	2	0.0194174757281553
BP	GO:0070167	regulation of biomineral tissue development	2/51	103/18903	0.0315296280862702	0.110197831579837	0.0731372231572197	SGMS2/PHOSPHO1	2	0.0194174757281553
BP	GO:0006705	mineralocorticoid biosynthetic process	1/51	12/18903	0.0319088337771958	0.110197831579837	0.0731372231572197	CYP21A2	1	0.0833333333333333
BP	GO:0009134	nucleoside diphosphate catabolic process	1/51	12/18903	0.0319088337771958	0.110197831579837	0.0731372231572197	ENTPD8	1	0.0833333333333333
BP	GO:0019627	urea metabolic process	1/51	12/18903	0.0319088337771958	0.110197831579837	0.0731372231572197	OTC	1	0.0833333333333333
BP	GO:0031650	regulation of heat generation	1/51	12/18903	0.0319088337771958	0.110197831579837	0.0731372231572197	PTGS2	1	0.0833333333333333
BP	GO:0032782	bile acid secretion	1/51	12/18903	0.0319088337771958	0.110197831579837	0.0731372231572197	ABCB11	1	0.0833333333333333
BP	GO:0033539	fatty acid beta-oxidation using acyl-CoA dehydrogenase	1/51	12/18903	0.0319088337771958	0.110197831579837	0.0731372231572197	ETFB	1	0.0833333333333333
BP	GO:0033540	fatty acid beta-oxidation using acyl-CoA oxidase	1/51	12/18903	0.0319088337771958	0.110197831579837	0.0731372231572197	DECR2	1	0.0833333333333333
BP	GO:0033629	negative regulation of cell adhesion mediated by integrin	1/51	12/18903	0.0319088337771958	0.110197831579837	0.0731372231572197	CYP1B1	1	0.0833333333333333
BP	GO:0038183	bile acid signaling pathway	1/51	12/18903	0.0319088337771958	0.110197831579837	0.0731372231572197	ABCB11	1	0.0833333333333333
BP	GO:0042416	dopamine biosynthetic process	1/51	12/18903	0.0319088337771958	0.110197831579837	0.0731372231572197	TH	1	0.0833333333333333
BP	GO:0042447	hormone catabolic process	1/51	12/18903	0.0319088337771958	0.110197831579837	0.0731372231572197	CYP19A1	1	0.0833333333333333
BP	GO:0046051	UTP metabolic process	1/51	12/18903	0.0319088337771958	0.110197831579837	0.0731372231572197	NME3	1	0.0833333333333333
BP	GO:0060736	prostate gland growth	1/51	12/18903	0.0319088337771958	0.110197831579837	0.0731372231572197	CYP19A1	1	0.0833333333333333
BP	GO:0070586	cell-cell adhesion involved in gastrulation	1/51	12/18903	0.0319088337771958	0.110197831579837	0.0731372231572197	APOA1	1	0.0833333333333333
BP	GO:0071941	nitrogen cycle metabolic process	1/51	12/18903	0.0319088337771958	0.110197831579837	0.0731372231572197	OTC	1	0.0833333333333333
BP	GO:1904350	regulation of protein catabolic process in the vacuole	1/51	12/18903	0.0319088337771958	0.110197831579837	0.0731372231572197	LRP2	1	0.0833333333333333
BP	GO:0015914	phospholipid transport	2/51	104/18903	0.0320933181373878	0.11021402811327	0.073147972638068	APOA2/APOA1	2	0.0192307692307692
BP	GO:0032637	interleukin-8 production	2/51	104/18903	0.0320933181373878	0.11021402811327	0.073147972638068	APOA2/PLA2G1B	2	0.0192307692307692
BP	GO:0110149	regulation of biomineralization	2/51	105/18903	0.0326609973723809	0.111550203313041	0.0740347790512413	SGMS2/PHOSPHO1	2	0.019047619047619
BP	GO:0002683	negative regulation of immune system process	4/51	449/18903	0.0326643743795936	0.111550203313041	0.0740347790512413	APOA2/APOA1/PLA2G2D/CYP19A1	4	0.0089086859688196
BP	GO:0022600	digestive system process	2/51	106/18903	0.0332326410863054	0.113175605477251	0.0751135425722634	APOA2/APOA1	2	0.0188679245283019
BP	GO:0006672	ceramide metabolic process	2/51	107/18903	0.0338082246738372	0.114082068654646	0.075715153318487	DEGS2/SGMS2	2	0.0186915887850467
BP	GO:0006855	xenobiotic transmembrane transport	1/51	13/18903	0.0345223878228987	0.114082068654646	0.075715153318487	ABCB11	1	0.0769230769230769
BP	GO:0009133	nucleoside diphosphate biosynthetic process	1/51	13/18903	0.0345223878228987	0.114082068654646	0.075715153318487	ENTPD8	1	0.0769230769230769
BP	GO:0009176	pyrimidine deoxyribonucleoside monophosphate metabolic process	1/51	13/18903	0.0345223878228987	0.114082068654646	0.075715153318487	DPYS	1	0.0769230769230769
BP	GO:0009415	response to water	1/51	13/18903	0.0345223878228987	0.114082068654646	0.075715153318487	TH	1	0.0769230769230769
BP	GO:0010524	positive regulation of calcium ion transport into cytosol	1/51	13/18903	0.0345223878228987	0.114082068654646	0.075715153318487	PLA2G1B	1	0.0769230769230769
BP	GO:0031392	regulation of prostaglandin biosynthetic process	1/51	13/18903	0.0345223878228987	0.114082068654646	0.075715153318487	PTGS2	1	0.0769230769230769
BP	GO:0042363	fat-soluble vitamin catabolic process	1/51	13/18903	0.0345223878228987	0.114082068654646	0.075715153318487	CYP4F3	1	0.0769230769230769
BP	GO:0042415	norepinephrine metabolic process	1/51	13/18903	0.0345223878228987	0.114082068654646	0.075715153318487	TH	1	0.0769230769230769
BP	GO:0071287	cellular response to manganese ion	1/51	13/18903	0.0345223878228987	0.114082068654646	0.075715153318487	TH	1	0.0769230769230769
BP	GO:0140042	lipid droplet formation	1/51	13/18903	0.0345223878228987	0.114082068654646	0.075715153318487	FITM1	1	0.0769230769230769
BP	GO:0006766	vitamin metabolic process	2/51	110/18903	0.0355583701119846	0.11686512582521	0.0775622411461209	LRP2/CYP4F3	2	0.0181818181818182
BP	GO:0032868	response to insulin	3/51	269/18903	0.0359658748836909	0.11686512582521	0.0775622411461209	APRT/PLA2G1B/OTC	3	0.0111524163568773
BP	GO:0006167	AMP biosynthetic process	1/51	14/18903	0.0371290240442345	0.11686512582521	0.0775622411461209	APRT	1	0.0714285714285714
BP	GO:0006177	GMP biosynthetic process	1/51	14/18903	0.0371290240442345	0.11686512582521	0.0775622411461209	APRT	1	0.0714285714285714
BP	GO:0006241	CTP biosynthetic process	1/51	14/18903	0.0371290240442345	0.11686512582521	0.0775622411461209	NME3	1	0.0714285714285714
BP	GO:0008212	mineralocorticoid metabolic process	1/51	14/18903	0.0371290240442345	0.11686512582521	0.0775622411461209	CYP21A2	1	0.0714285714285714
BP	GO:0009812	flavonoid metabolic process	1/51	14/18903	0.0371290240442345	0.11686512582521	0.0775622411461209	UGT1A9	1	0.0714285714285714
BP	GO:0010896	regulation of triglyceride catabolic process	1/51	14/18903	0.0371290240442345	0.11686512582521	0.0775622411461209	APOA1	1	0.0714285714285714
BP	GO:0035630	bone mineralization involved in bone maturation	1/51	14/18903	0.0371290240442345	0.11686512582521	0.0775622411461209	PHOSPHO1	1	0.0714285714285714
BP	GO:0036151	phosphatidylcholine acyl-chain remodeling	1/51	14/18903	0.0371290240442345	0.11686512582521	0.0775622411461209	TMEM86B	1	0.0714285714285714
BP	GO:0042136	neurotransmitter biosynthetic process	1/51	14/18903	0.0371290240442345	0.11686512582521	0.0775622411461209	TH	1	0.0714285714285714
BP	GO:0043101	purine-containing compound salvage	1/51	14/18903	0.0371290240442345	0.11686512582521	0.0775622411461209	APRT	1	0.0714285714285714
BP	GO:0044849	estrous cycle	1/51	14/18903	0.0371290240442345	0.11686512582521	0.0775622411461209	CYP1B1	1	0.0714285714285714
BP	GO:0046049	UMP metabolic process	1/51	14/18903	0.0371290240442345	0.11686512582521	0.0775622411461209	DPYS	1	0.0714285714285714
BP	GO:0046185	aldehyde catabolic process	1/51	14/18903	0.0371290240442345	0.11686512582521	0.0775622411461209	ADH4	1	0.0714285714285714
BP	GO:0047484	regulation of response to osmotic stress	1/51	14/18903	0.0371290240442345	0.11686512582521	0.0775622411461209	PTGS2	1	0.0714285714285714
BP	GO:1905522	negative regulation of macrophage migration	1/51	14/18903	0.0371290240442345	0.11686512582521	0.0775622411461209	CYP19A1	1	0.0714285714285714
BP	GO:2001140	positive regulation of phospholipid transport	1/51	14/18903	0.0371290240442345	0.11686512582521	0.0775622411461209	APOA1	1	0.0714285714285714
BP	GO:0046700	heterocycle catabolic process	4/51	468/18903	0.037175692554512	0.11686512582521	0.0775622411461209	NT5C1A/ALDH1L1/DPYS/ENTPD8	4	0.00854700854700855
BP	GO:0009063	cellular amino acid catabolic process	2/51	113/18903	0.0373430981131126	0.117091146513238	0.0777122488664317	ETFB/OTC	2	0.0176991150442478
BP	GO:0044270	cellular nitrogen compound catabolic process	4/51	474/18903	0.0386719073378854	0.11908914482678	0.0790383008080203	NT5C1A/ALDH1L1/DPYS/ENTPD8	4	0.00843881856540084
BP	GO:0002864	regulation of acute inflammatory response to antigenic stimulus	1/51	15/18903	0.0397287603867481	0.11908914482678	0.0790383008080203	PLA2G2D	1	0.0666666666666667
BP	GO:0006206	pyrimidine nucleobase metabolic process	1/51	15/18903	0.0397287603867481	0.11908914482678	0.0790383008080203	DPYS	1	0.0666666666666667
BP	GO:0006570	tyrosine metabolic process	1/51	15/18903	0.0397287603867481	0.11908914482678	0.0790383008080203	TH	1	0.0666666666666667
BP	GO:0009111	vitamin catabolic process	1/51	15/18903	0.0397287603867481	0.11908914482678	0.0790383008080203	CYP4F3	1	0.0666666666666667
BP	GO:0009163	nucleoside biosynthetic process	1/51	15/18903	0.0397287603867481	0.11908914482678	0.0790383008080203	APRT	1	0.0666666666666667
BP	GO:0009173	pyrimidine ribonucleoside monophosphate metabolic process	1/51	15/18903	0.0397287603867481	0.11908914482678	0.0790383008080203	DPYS	1	0.0666666666666667
BP	GO:0009209	pyrimidine ribonucleoside triphosphate biosynthetic process	1/51	15/18903	0.0397287603867481	0.11908914482678	0.0790383008080203	NME3	1	0.0666666666666667
BP	GO:0010889	regulation of sequestering of triglyceride	1/51	15/18903	0.0397287603867481	0.11908914482678	0.0790383008080203	FITM1	1	0.0666666666666667
BP	GO:0032488	Cdc42 protein signal transduction	1/51	15/18903	0.0397287603867481	0.11908914482678	0.0790383008080203	APOA1	1	0.0666666666666667
BP	GO:0034404	nucleobase-containing small molecule biosynthetic process	1/51	15/18903	0.0397287603867481	0.11908914482678	0.0790383008080203	APRT	1	0.0666666666666667
BP	GO:0042182	ketone catabolic process	1/51	15/18903	0.0397287603867481	0.11908914482678	0.0790383008080203	CYP4F3	1	0.0666666666666667
BP	GO:0060354	negative regulation of cell adhesion molecule production	1/51	15/18903	0.0397287603867481	0.11908914482678	0.0790383008080203	APOA1	1	0.0666666666666667
BP	GO:0090205	positive regulation of cholesterol metabolic process	1/51	15/18903	0.0397287603867481	0.11908914482678	0.0790383008080203	APOA1	1	0.0666666666666667
BP	GO:1902563	regulation of neutrophil activation	1/51	15/18903	0.0397287603867481	0.11908914482678	0.0790383008080203	PLA2G2A	1	0.0666666666666667
BP	GO:1904251	regulation of bile acid metabolic process	1/51	15/18903	0.0397287603867481	0.11908914482678	0.0790383008080203	ABCB11	1	0.0666666666666667
BP	GO:2001138	regulation of phospholipid transport	1/51	15/18903	0.0397287603867481	0.11908914482678	0.0790383008080203	APOA1	1	0.0666666666666667
BP	GO:2001279	regulation of unsaturated fatty acid biosynthetic process	1/51	15/18903	0.0397287603867481	0.11908914482678	0.0790383008080203	PTGS2	1	0.0666666666666667
BP	GO:0043542	endothelial cell migration	3/51	281/18903	0.0401127914013589	0.119947029897722	0.0796076707400524	CYP1B1/PTGS2/APOA1	3	0.0106761565836299
BP	GO:0002718	regulation of cytokine production involved in immune response	2/51	118/18903	0.0403927373740937	0.120197805875337	0.0797741083039715	APOA2/APOA1	2	0.0169491525423729
BP	GO:0050830	defense response to Gram-positive bacterium	2/51	118/18903	0.0403927373740937	0.120197805875337	0.0797741083039715	PLA2G1B/PLA2G2A	2	0.0169491525423729
BP	GO:0002367	cytokine production involved in immune response	2/51	120/18903	0.041638323601366	0.122662647007011	0.0814099992585382	APOA2/APOA1	2	0.0166666666666667
BP	GO:0007613	memory	2/51	120/18903	0.041638323601366	0.122662647007011	0.0814099992585382	PTGS2/TH	2	0.0166666666666667
BP	GO:0001819	positive regulation of cytokine production	4/51	486/18903	0.0417677722089488	0.122662647007011	0.0814099992585382	CYP1B1/APOA2/PLA2G1B/PTGS2	4	0.00823045267489712
BP	GO:0006704	glucocorticoid biosynthetic process	1/51	16/18903	0.0423216147503798	0.122662647007011	0.0814099992585382	CYP21A2	1	0.0625
BP	GO:0034638	phosphatidylcholine catabolic process	1/51	16/18903	0.0423216147503798	0.122662647007011	0.0814099992585382	GDPD3	1	0.0625
BP	GO:0045986	negative regulation of smooth muscle contraction	1/51	16/18903	0.0423216147503798	0.122662647007011	0.0814099992585382	PTGS2	1	0.0625
BP	GO:0046036	CTP metabolic process	1/51	16/18903	0.0423216147503798	0.122662647007011	0.0814099992585382	NME3	1	0.0625
BP	GO:0046834	lipid phosphorylation	1/51	16/18903	0.0423216147503798	0.122662647007011	0.0814099992585382	DGKB	1	0.0625
BP	GO:0060033	anatomical structure regression	1/51	16/18903	0.0423216147503798	0.122662647007011	0.0814099992585382	TH	1	0.0625
BP	GO:0061469	regulation of type B pancreatic cell proliferation	1/51	16/18903	0.0423216147503798	0.122662647007011	0.0814099992585382	SGPP2	1	0.0625
BP	GO:0090336	positive regulation of brown fat cell differentiation	1/51	16/18903	0.0423216147503798	0.122662647007011	0.0814099992585382	PTGS2	1	0.0625
BP	GO:0019439	aromatic compound catabolic process	4/51	489/18903	0.0425633115421909	0.12307221686492	0.0816818267679085	NT5C1A/ALDH1L1/DPYS/ENTPD8	4	0.0081799591002045
BP	GO:0002698	negative regulation of immune effector process	2/51	122/18903	0.0428983326047731	0.123458581627821	0.0819382532826529	APOA2/APOA1	2	0.0163934426229508
BP	GO:0030278	regulation of ossification	2/51	122/18903	0.0428983326047731	0.123458581627821	0.0819382532826529	SGMS2/PHOSPHO1	2	0.0163934426229508
BP	GO:0006520	cellular amino acid metabolic process	3/51	289/18903	0.0430072503834436	0.123482175574009	0.0819539123540044	ETFB/OTC/TH	3	0.0103806228373702
BP	GO:0009084	glutamine family amino acid biosynthetic process	1/51	17/18903	0.0449076049895778	0.126567180959132	0.0840014002587868	OTC	1	0.0588235294117647
BP	GO:0009151	purine deoxyribonucleotide metabolic process	1/51	17/18903	0.0449076049895778	0.126567180959132	0.0840014002587868	NT5C1A	1	0.0588235294117647
BP	GO:0031649	heat generation	1/51	17/18903	0.0449076049895778	0.126567180959132	0.0840014002587868	PTGS2	1	0.0588235294117647
BP	GO:0051412	response to corticosterone	1/51	17/18903	0.0449076049895778	0.126567180959132	0.0840014002587868	TH	1	0.0588235294117647
BP	GO:0060192	negative regulation of lipase activity	1/51	17/18903	0.0449076049895778	0.126567180959132	0.0840014002587868	APOA2	1	0.0588235294117647
BP	GO:0061548	ganglion development	1/51	17/18903	0.0449076049895778	0.126567180959132	0.0840014002587868	CYP1B1	1	0.0588235294117647
BP	GO:0090136	epithelial cell-cell adhesion	1/51	17/18903	0.0449076049895778	0.126567180959132	0.0840014002587868	CYP1B1	1	0.0588235294117647
BP	GO:0110096	cellular response to aldehyde	1/51	17/18903	0.0449076049895778	0.126567180959132	0.0840014002587868	ADH4	1	0.0588235294117647
BP	GO:0045471	response to ethanol	2/51	128/18903	0.0467630554409065	0.129663149594305	0.0860561643654141	ABCB11/TH	2	0.015625
BP	GO:0046683	response to organophosphorus	2/51	128/18903	0.0467630554409065	0.129663149594305	0.0860561643654141	CYP1B1/PTGS2	2	0.015625
BP	GO:0003128	heart field specification	1/51	18/18903	0.0474867489134119	0.129663149594305	0.0860561643654141	LRP2	1	0.0555555555555556
BP	GO:0009208	pyrimidine ribonucleoside triphosphate metabolic process	1/51	18/18903	0.0474867489134119	0.129663149594305	0.0860561643654141	NME3	1	0.0555555555555556
BP	GO:0010522	regulation of calcium ion transport into cytosol	1/51	18/18903	0.0474867489134119	0.129663149594305	0.0860561643654141	PLA2G1B	1	0.0555555555555556
BP	GO:0030730	sequestering of triglyceride	1/51	18/18903	0.0474867489134119	0.129663149594305	0.0860561643654141	FITM1	1	0.0555555555555556
BP	GO:0032310	prostaglandin secretion	1/51	18/18903	0.0474867489134119	0.129663149594305	0.0860561643654141	PTGS2	1	0.0555555555555556
BP	GO:0043173	nucleotide salvage	1/51	18/18903	0.0474867489134119	0.129663149594305	0.0860561643654141	APRT	1	0.0555555555555556
BP	GO:0043649	dicarboxylic acid catabolic process	1/51	18/18903	0.0474867489134119	0.129663149594305	0.0860561643654141	ALDH1L1	1	0.0555555555555556
BP	GO:0046112	nucleobase biosynthetic process	1/51	18/18903	0.0474867489134119	0.129663149594305	0.0860561643654141	APRT	1	0.0555555555555556
BP	GO:0046653	tetrahydrofolate metabolic process	1/51	18/18903	0.0474867489134119	0.129663149594305	0.0860561643654141	ALDH1L1	1	0.0555555555555556
BP	GO:0050746	regulation of lipoprotein metabolic process	1/51	18/18903	0.0474867489134119	0.129663149594305	0.0860561643654141	LIPG	1	0.0555555555555556
BP	GO:0071318	cellular response to ATP	1/51	18/18903	0.0474867489134119	0.129663149594305	0.0860561643654141	PTGS2	1	0.0555555555555556
BP	GO:1905146	lysosomal protein catabolic process	1/51	18/18903	0.0474867489134119	0.129663149594305	0.0860561643654141	LRP2	1	0.0555555555555556
BP	GO:0051047	positive regulation of secretion	3/51	304/18903	0.0487106461606166	0.131700456682945	0.087408305156621	PLA2G1B/ABCB11/CYP19A1	3	0.00986842105263158
BP	GO:0009132	nucleoside diphosphate metabolic process	2/51	132/18903	0.049408302488325	0.131700456682945	0.087408305156621	NME3/ENTPD8	2	0.0151515151515152
BP	GO:0034219	carbohydrate transmembrane transport	2/51	132/18903	0.049408302488325	0.131700456682945	0.087408305156621	PLA2G1B/ABCB11	2	0.0151515151515152
BP	GO:0071375	cellular response to peptide hormone stimulus	3/51	306/18903	0.0494980345022138	0.131700456682945	0.087408305156621	APRT/CYP1B1/PLA2G1B	3	0.00980392156862745
CC	GO:0034364	high-density lipoprotein particle	3/50	27/19869	4.20316578386554e-05	0.00347119685834051	0.00277425090042809	LCAT/APOA2/APOA1	3	0.111111111111111
CC	GO:0034358	plasma lipoprotein particle	3/50	36/19869	0.000100977040843396	0.00347119685834051	0.00277425090042809	LCAT/APOA2/APOA1	3	0.0833333333333333
CC	GO:1990777	lipoprotein particle	3/50	36/19869	0.000100977040843396	0.00347119685834051	0.00277425090042809	LCAT/APOA2/APOA1	3	0.0833333333333333
CC	GO:0032994	protein-lipid complex	3/50	39/19869	0.000128562846605204	0.00347119685834051	0.00277425090042809	LCAT/APOA2/APOA1	3	0.0769230769230769
CC	GO:0042627	chylomicron	2/50	13/19869	0.000475593486706678	0.0102728193128642	0.00821024545472581	APOA2/APOA1	2	0.153846153846154
CC	GO:0098800	inner mitochondrial membrane protein complex	4/50	158/19869	0.000666927776199576	0.0120046999715924	0.0095943995874325	ATP5MC1/NDUFB7/NDUFA7/COX4I2	4	0.0253164556962025
CC	GO:0034361	very-low-density lipoprotein particle	2/50	20/19869	0.00114552768452311	0.0154646237410619	0.0123596408066967	APOA2/APOA1	2	0.1
CC	GO:0034385	triglyceride-rich plasma lipoprotein particle	2/50	20/19869	0.00114552768452311	0.0154646237410619	0.0123596408066967	APOA2/APOA1	2	0.1
CC	GO:0098803	respiratory chain complex	3/50	91/19869	0.0015589452255478	0.0184791590445857	0.0147689185346591	NDUFB7/NDUFA7/COX4I2	3	0.032967032967033
CC	GO:0005746	mitochondrial respirasome	3/50	94/19869	0.00171103324486904	0.0184791590445857	0.0147689185346591	NDUFB7/NDUFA7/COX4I2	3	0.0319148936170213
CC	GO:0070469	respirasome	3/50	101/19869	0.00210115794853253	0.0206295507674103	0.0164875551942266	NDUFB7/NDUFA7/COX4I2	3	0.0297029702970297
CC	GO:1990204	oxidoreductase complex	3/50	125/19869	0.0038405570283281	0.0345650132549529	0.0276250593265706	NDUFB7/ETFB/NDUFA7	3	0.024
CC	GO:0098798	mitochondrial protein-containing complex	4/50	295/19869	0.00641442035007321	0.045684430552328	0.0365119230535175	ATP5MC1/NDUFB7/NDUFA7/COX4I2	4	0.0135593220338983
CC	GO:0005747	mitochondrial respiratory chain complex I	2/50	49/19869	0.00676806378553007	0.045684430552328	0.0365119230535175	NDUFB7/NDUFA7	2	0.0408163265306122
CC	GO:0030964	NADH dehydrogenase complex	2/50	49/19869	0.00676806378553007	0.045684430552328	0.0365119230535175	NDUFB7/NDUFA7	2	0.0408163265306122
CC	GO:0045271	respiratory chain complex I	2/50	49/19869	0.00676806378553007	0.045684430552328	0.0365119230535175	NDUFB7/NDUFA7	2	0.0408163265306122
CC	GO:0005743	mitochondrial inner membrane	5/50	498/19869	0.00812512936375408	0.0516184688991436	0.0412545268004851	ATP5MC1/NDUFB7/NDUFA7/COX4I2/OTC	5	0.0100401606425703
CC	GO:0005769	early endosome	4/50	414/19869	0.0201400967902368	0.120840580741421	0.0965782419180948	APOA2/PLA2G4E/LIPG/APOA1	4	0.00966183574879227
CC	GO:0000276	mitochondrial proton-transporting ATP synthase complex, coupling factor F(o)	1/50	11/19869	0.0273424261116372	0.15542010631878	0.124214899786939	ATP5MC1	1	0.0909090909090909
CC	GO:1990229	iron-sulfur cluster assembly complex	1/50	12/19869	0.0297914581740008	0.160873874139604	0.128573661593056	FDX2	1	0.0833333333333333
CC	GO:0005759	mitochondrial matrix	4/50	483/19869	0.0329852749358712	0.169638556813052	0.13557857367125	ETFB/NDUFA7/FDX2/OTC	4	0.0082815734989648
CC	GO:0045263	proton-transporting ATP synthase complex, coupling factor F(o)	1/50	14/19869	0.0346714068926594	0.170205088382146	0.13603135718651	ATP5MC1	1	0.0714285714285714
CC	GO:0005788	endoplasmic reticulum lumen	3/50	312/19869	0.0437395548049595	0.199016276353496	0.159057842699675	APOA2/PTGS2/APOA1	3	0.00961538461538462
CC	GO:0033162	melanosome membrane	1/50	20/19869	0.049167377315075	0.199016276353496	0.159057842699675	TH	1	0.05
CC	GO:0045009	chitosome	1/50	20/19869	0.049167377315075	0.199016276353496	0.159057842699675	TH	1	0.05
CC	GO:0090741	pigment granule membrane	1/50	20/19869	0.049167377315075	0.199016276353496	0.159057842699675	TH	1	0.05
MF	GO:0004620	phospholipase activity	8/51	108/18432	5.51900035970298e-10	1.04861006834357e-07	4.99614769404691e-08	LCAT/GDPD3/PLA2G4E/PLA2G1B/LIPG/PLA2G2A/PLA2G2D/LIPI	8	0.0740740740740741
MF	GO:0016298	lipase activity	8/51	130/18432	2.43236469206922e-09	2.31074645746576e-07	1.10096507114712e-07	LCAT/GDPD3/PLA2G4E/PLA2G1B/LIPG/PLA2G2A/PLA2G2D/LIPI	8	0.0615384615384615
MF	GO:0052689	carboxylic ester hydrolase activity	8/51	152/18432	8.38247232876663e-09	5.3088991415522e-07	2.52944779043484e-07	LCAT/GDPD3/PLA2G4E/PLA2G1B/LIPG/PLA2G2A/PLA2G2D/LIPI	8	0.0526315789473684
MF	GO:0004623	phospholipase A2 activity	5/51	36/18432	4.68543807478456e-08	2.22558308552267e-06	1.06038861692493e-06	LCAT/PLA2G4E/PLA2G1B/PLA2G2A/PLA2G2D	5	0.138888888888889
MF	GO:0047498	calcium-dependent phospholipase A2 activity	4/51	16/18432	9.23120585989257e-08	3.50785822675917e-06	1.67133411358055e-06	PLA2G4E/PLA2G1B/PLA2G2A/PLA2G2D	4	0.25
MF	GO:0016705	oxidoreductase activity, acting on paired donors, with incorporation or reduction of molecular oxygen	7/51	179/18432	5.84866859622174e-07	1.85207838880355e-05	8.82430700482579e-06	CYP1B1/DEGS2/CYP21A2/CYP4F3/PTGS2/CYP19A1/TH	7	0.0391061452513966
MF	GO:0009055	electron transfer activity	6/51	122/18432	1.04899971083754e-06	2.84728492941617e-05	1.35660112980494e-05	NDUFB7/ETFB/NDUFA7/FDX2/COX4I2/CYP19A1	6	0.0491803278688525
MF	GO:0020037	heme binding	6/51	139/18432	2.24879815125382e-06	5.34089560922781e-05	2.54469264483985e-05	CYP1B1/CYP21A2/CYP4F3/PTGS2/TPO/CYP19A1	6	0.0431654676258993
MF	GO:0046906	tetrapyrrole binding	6/51	149/18432	3.36592071099765e-06	7.10583261210615e-05	3.38560445784559e-05	CYP1B1/CYP21A2/CYP4F3/PTGS2/TPO/CYP19A1	6	0.0402684563758389
MF	GO:0004497	monooxygenase activity	5/51	104/18432	9.92171628364821e-06	0.000188512609389316	8.98176421467101e-05	CYP1B1/CYP21A2/CYP4F3/CYP19A1/TH	5	0.0480769230769231
MF	GO:0070330	aromatase activity	3/51	25/18432	4.39695708948922e-05	0.00075947440636632	0.000361854841814424	CYP1B1/CYP4F3/CYP19A1	3	0.12
MF	GO:0005506	iron ion binding	5/51	153/18432	6.37312136436735e-05	0.00100907754935816	0.000480779330996134	CYP1B1/CYP21A2/CYP4F3/CYP19A1/TH	5	0.0326797385620915
MF	GO:0008395	steroid hydroxylase activity	3/51	38/18432	0.000157234798631753	0.00229804705692563	0.00109491438723326	CYP1B1/CYP21A2/CYP19A1	3	0.0789473684210526
MF	GO:0016712	oxidoreductase activity, acting on paired donors, with incorporation or reduction of molecular oxygen, reduced flavin or flavoprotein as one donor, and incorporation of one atom of oxygen	3/51	40/18432	0.000183432373426253	0.002489439353642	0.00118610406877126	CYP1B1/CYP4F3/CYP19A1	3	0.075
MF	GO:0004465	lipoprotein lipase activity	2/51	11/18432	0.000406305243988275	0.00514653309051816	0.00245208778828012	LIPG/LIPI	2	0.181818181818182
MF	GO:0008035	high-density lipoprotein particle binding	2/51	12/18432	0.00048670350871318	0.00549265002330807	0.00261699668700551	APOA2/APOA1	2	0.166666666666667
MF	GO:0042578	phosphoric ester hydrolase activity	6/51	365/18432	0.000491447633664406	0.00549265002330807	0.00261699668700551	GDPD3/MTMR8/SGPP2/PHOSPHO1/NT5C1A/TPTE	6	0.0164383561643836
MF	GO:0016655	oxidoreductase activity, acting on NAD(P)H, quinone or similar compound as acceptor	3/51	57/18432	0.00052555091390841	0.00554748186903322	0.00264312155532885	NDUFB7/NDUFA7/ADH4	3	0.0526315789473684
MF	GO:0016791	phosphatase activity	5/51	276/18432	0.000971496277315784	0.00862782447475199	0.00411076401567131	MTMR8/SGPP2/PHOSPHO1/NT5C1A/TPTE	5	0.0181159420289855
MF	GO:0004030	aldehyde dehydrogenase [NAD(P)+] activity	2/51	17/18432	0.000994066821163388	0.00862782447475199	0.00411076401567131	ALDH1L1/ADH4	2	0.117647058823529
MF	GO:0008970	phospholipase A1 activity	2/51	17/18432	0.000994066821163388	0.00862782447475199	0.00411076401567131	PLA2G4E/LIPG	2	0.117647058823529
MF	GO:0015453	oxidoreduction-driven active transmembrane transporter activity	3/51	71/18432	0.000999011254971283	0.00862782447475199	0.00411076401567131	NDUFB7/NDUFA7/COX4I2	3	0.0422535211267606
MF	GO:0015399	primary active transmembrane transporter activity	4/51	169/18432	0.00121841270137287	0.0100651484026454	0.00479558317245155	NDUFB7/NDUFA7/COX4I2/ABCB11	4	0.0236686390532544
MF	GO:0120020	cholesterol transfer activity	2/51	22/18432	0.00167358704664383	0.0132492307859303	0.00631265289523549	APOA2/APOA1	2	0.0909090909090909
MF	GO:0016651	oxidoreductase activity, acting on NAD(P)H	3/51	87/18432	0.0017960024372523	0.0133287220886118	0.00635052686770426	NDUFB7/NDUFA7/ADH4	3	0.0344827586206897
MF	GO:0120015	sterol transfer activity	2/51	23/18432	0.00182973924230472	0.0133287220886118	0.00635052686770426	APOA2/APOA1	2	0.0869565217391304
MF	GO:0005543	phospholipid binding	6/51	474/18432	0.00189408155996063	0.0133287220886118	0.00635052686770426	APOA2/PLA2G4E/PLA2G2A/APOA1/OTC/PLA2G2D	6	0.0126582278481013
MF	GO:0043178	alcohol binding	3/51	90/18432	0.00197905337698344	0.0134292907723876	0.00639844324889383	APOA2/ADH4/APOA1	3	0.0333333333333333
MF	GO:0004806	triglyceride lipase activity	2/51	26/18432	0.00233802934883926	0.0153181233199814	0.00729838562614071	LIPG/LIPI	2	0.0769230769230769
MF	GO:0016628	oxidoreductase activity, acting on the CH-CH group of donors, NAD or NADP as acceptor	2/51	28/18432	0.00270971979623047	0.0168433215758103	0.00802507288376558	DECR2/SRD5A2	2	0.0714285714285714
MF	GO:0005496	steroid binding	3/51	101/18432	0.00274812088868484	0.0168433215758103	0.00802507288376558	CYP21A2/APOA2/APOA1	3	0.0297029702970297
MF	GO:0070325	lipoprotein particle receptor binding	2/51	29/18432	0.00290530562110035	0.0172502521252833	0.00821895669127073	APOA2/APOA1	2	0.0689655172413793
MF	GO:0071813	lipoprotein particle binding	2/51	30/18432	0.00310733728647361	0.0173645318949996	0.00827340577822696	APOA2/APOA1	2	0.0666666666666667
MF	GO:0071814	protein-lipid complex binding	2/51	30/18432	0.00310733728647361	0.0173645318949996	0.00827340577822696	APOA2/APOA1	2	0.0666666666666667
MF	GO:0031210	phosphatidylcholine binding	2/51	31/18432	0.00331577904999606	0.0179999434142643	0.00857615032480183	APOA2/APOA1	2	0.0645161290322581
MF	GO:0052866	phosphatidylinositol phosphate phosphatase activity	2/51	34/18432	0.00397920962849339	0.0210013841503818	0.0100061996505974	MTMR8/TPTE	2	0.0588235294117647
MF	GO:0015248	sterol transporter activity	2/51	36/18432	0.00445289824924238	0.0228662342528663	0.0108947154889003	APOA2/APOA1	2	0.0555555555555556
MF	GO:0005501	retinoid binding	2/51	38/18432	0.00495138141984638	0.024122114609508	0.0114930850771063	ADH4/UGT1A9	2	0.0526315789473684
MF	GO:0019840	isoprenoid binding	2/51	38/18432	0.00495138141984638	0.024122114609508	0.0114930850771063	ADH4/UGT1A9	2	0.0526315789473684
MF	GO:0016620	oxidoreductase activity, acting on the aldehyde or oxo group of donors, NAD or NADP as acceptor	2/51	39/18432	0.00520983414610608	0.0241431338478086	0.0115030997834435	ALDH1L1/ADH4	2	0.0512820512820513
MF	GO:0019825	oxygen binding	2/51	39/18432	0.00520983414610608	0.0241431338478086	0.0115030997834435	CYP19A1/TH	2	0.0512820512820513
MF	GO:0008137	NADH dehydrogenase (ubiquinone) activity	2/51	41/18432	0.00574498945796881	0.0253848371398622	0.0120947146483554	NDUFB7/NDUFA7	2	0.0487804878048781
MF	GO:0050997	quaternary ammonium group binding	2/51	41/18432	0.00574498945796881	0.0253848371398622	0.0120947146483554	APOA2/APOA1	2	0.0487804878048781
MF	GO:0050136	NADH dehydrogenase (quinone) activity	2/51	42/18432	0.0060216234864067	0.026002465054938	0.0123889861203583	NDUFB7/NDUFA7	2	0.0476190476190476
MF	GO:0043177	organic acid binding	3/51	137/18432	0.00644801356123466	0.0266518818017666	0.0126984035177392	OTC/TH/UGT1A9	3	0.0218978102189781
MF	GO:0016614	oxidoreductase activity, acting on CH-OH group of donors	3/51	138/18432	0.00657858673744274	0.0266518818017666	0.0126984035177392	CYP4F3/ADH4/SRD5A2	3	0.0217391304347826
MF	GO:0003954	NADH dehydrogenase activity	2/51	44/18432	0.00659283391938437	0.0266518818017666	0.0126984035177392	NDUFB7/NDUFA7	2	0.0454545454545455
MF	GO:0003955	NAD(P)H dehydrogenase (quinone) activity	2/51	45/18432	0.00688734258398964	0.0272623977282923	0.0129892864522612	NDUFB7/NDUFA7	2	0.0444444444444444
MF	GO:0016903	oxidoreductase activity, acting on the aldehyde or oxo group of donors	2/51	47/18432	0.00749399847306751	0.0290583614261802	0.0138449810673213	ALDH1L1/ADH4	2	0.0425531914893617
MF	GO:0120013	lipid transfer activity	2/51	50/18432	0.00844757772606548	0.0321007953590488	0.0152945617777185	APOA2/APOA1	2	0.04
MF	GO:0015485	cholesterol binding	2/51	51/18432	0.00877693026172554	0.0326983676417226	0.015579277657552	APOA2/APOA1	2	0.0392156862745098
MF	GO:0008374	O-acyltransferase activity	2/51	54/18432	0.0097990060860556	0.035066844788221	0.0167077487633629	LCAT/AWAT1	2	0.037037037037037
MF	GO:0016597	amino acid binding	2/51	54/18432	0.0097990060860556	0.035066844788221	0.0167077487633629	OTC/TH	2	0.037037037037037
MF	GO:0005319	lipid transporter activity	3/51	161/18432	0.0100246945000832	0.035066844788221	0.0167077487633629	APOA2/ABCB11/APOA1	3	0.0186335403726708
MF	GO:0004601	peroxidase activity	2/51	55/18432	0.010150928754485	0.035066844788221	0.0167077487633629	PTGS2/TPO	2	0.0363636363636364
MF	GO:0016684	oxidoreductase activity, acting on peroxide as acceptor	2/51	57/18432	0.0108714259325966	0.0368851951284527	0.0175741095902877	PTGS2/TPO	2	0.0350877192982456
MF	GO:0008201	heparin binding	3/51	171/18432	0.0117949858710479	0.0392884622700536	0.0187191565386405	LIPG/PLA2G2D/LIPI	3	0.0175438596491228
MF	GO:0016627	oxidoreductase activity, acting on the CH-CH group of donors	2/51	60/18432	0.0119933200613848	0.0392884622700536	0.0187191565386405	DECR2/SRD5A2	2	0.0333333333333333
MF	GO:0032934	sterol binding	2/51	61/18432	0.0123781302388416	0.039861775345422	0.0189923140149933	APOA2/APOA1	2	0.0327868852459016
MF	GO:0033293	monocarboxylic acid binding	2/51	81/18432	0.0211609698179825	0.0670097377569447	0.0319270772692368	PLA2G1B/UGT1A9	2	0.0246913580246914
MF	GO:0016209	antioxidant activity	2/51	85/18432	0.0231538449003632	0.0711712382055987	0.0339098420259362	PTGS2/TPO	2	0.0235294117647059
MF	GO:0016747	acyltransferase activity, transferring groups other than amino-acyl groups	3/51	221/18432	0.0232242987828796	0.0711712382055987	0.0339098420259362	LCAT/PLA2G4E/AWAT1	3	0.0135746606334842
MF	GO:0016741	transferase activity, transferring one-carbon groups	3/51	225/18432	0.0243273000801347	0.0731418006083089	0.034848724943571	PNMT/ALDH1L1/OTC	3	0.0133333333333333
MF	GO:0016717	oxidoreductase activity, acting on paired donors, with oxidation of a pair of donors resulting in the reduction of molecular oxygen to two molecules of water	1/51	10/18432	0.027333876780306	0.0731418006083089	0.034848724943571	DEGS2	1	0.1
MF	GO:0016742	hydroxymethyl-, formyl- and related transferase activity	1/51	10/18432	0.027333876780306	0.0731418006083089	0.034848724943571	ALDH1L1	1	0.1
MF	GO:0016801	hydrolase activity, acting on ether bonds	1/51	10/18432	0.027333876780306	0.0731418006083089	0.034848724943571	TMEM86B	1	0.1
MF	GO:0016812	hydrolase activity, acting on carbon-nitrogen (but not peptide) bonds, in cyclic amides	1/51	10/18432	0.027333876780306	0.0731418006083089	0.034848724943571	DPYS	1	0.1
MF	GO:0018455	alcohol dehydrogenase [NAD(P)+] activity	1/51	10/18432	0.027333876780306	0.0731418006083089	0.034848724943571	ADH4	1	0.1
MF	GO:0034594	phosphatidylinositol trisphosphate phosphatase activity	1/51	10/18432	0.027333876780306	0.0731418006083089	0.034848724943571	TPTE	1	0.1
MF	GO:0052740	1-acyl-2-lysophosphatidylserine acylhydrolase activity	1/51	10/18432	0.027333876780306	0.0731418006083089	0.034848724943571	LIPG	1	0.1
MF	GO:0005539	glycosaminoglycan binding	3/51	237/18432	0.0278048321403553	0.0731418006083089	0.034848724943571	LIPG/PLA2G2D/LIPI	3	0.0126582278481013
MF	GO:0022804	active transmembrane transporter activity	4/51	417/18432	0.027999599318322	0.0731418006083089	0.034848724943571	NDUFB7/NDUFA7/COX4I2/ABCB11	4	0.00959232613908873
MF	GO:0004143	diacylglycerol kinase activity	1/51	11/18432	0.0300266339339373	0.0731418006083089	0.034848724943571	DGKB	1	0.0909090909090909
MF	GO:0008199	ferric iron binding	1/51	11/18432	0.0300266339339373	0.0731418006083089	0.034848724943571	TH	1	0.0909090909090909
MF	GO:0030283	testosterone dehydrogenase [NAD(P)] activity	1/51	11/18432	0.0300266339339373	0.0731418006083089	0.034848724943571	SRD5A2	1	0.0909090909090909
MF	GO:0032052	bile acid binding	1/51	11/18432	0.0300266339339373	0.0731418006083089	0.034848724943571	PLA2G1B	1	0.0909090909090909
MF	GO:0052629	phosphatidylinositol-3,5-bisphosphate 3-phosphatase activity	1/51	11/18432	0.0300266339339373	0.0731418006083089	0.034848724943571	MTMR8	1	0.0909090909090909
MF	GO:0052739	phosphatidylserine 1-acylhydrolase activity	1/51	11/18432	0.0300266339339373	0.0731418006083089	0.034848724943571	LIPG	1	0.0909090909090909
MF	GO:0016746	acyltransferase activity	3/51	248/18432	0.0312141392467364	0.0750719804668343	0.0357683674246413	LCAT/PLA2G4E/AWAT1	3	0.0120967741935484
MF	GO:0004032	alditol:NADP+ 1-oxidoreductase activity	1/51	12/18432	0.0327120821544128	0.0767320445597337	0.0365593120894022	ADH4	1	0.0833333333333333
MF	GO:0042301	phosphate ion binding	1/51	12/18432	0.0327120821544128	0.0767320445597337	0.0365593120894022	OTC	1	0.0833333333333333
MF	GO:0008253	5'-nucleotidase activity	1/51	13/18432	0.0353902408846035	0.0800493543818413	0.0381398585974424	NT5C1A	1	0.0769230769230769
MF	GO:0031994	insulin-like growth factor I binding	1/51	13/18432	0.0353902408846035	0.0800493543818413	0.0381398585974424	LRP2	1	0.0769230769230769
MF	GO:1901338	catecholamine binding	1/51	13/18432	0.0353902408846035	0.0800493543818413	0.0381398585974424	TH	1	0.0769230769230769
MF	GO:0008559	ABC-type xenobiotic transporter activity	1/51	14/18432	0.0380611295167161	0.0821774387292735	0.0391537935219807	ABCB11	1	0.0714285714285714
MF	GO:0019992	diacylglycerol binding	1/51	14/18432	0.0380611295167161	0.0821774387292735	0.0391537935219807	FITM1	1	0.0714285714285714
MF	GO:0042577	lipid phosphatase activity	1/51	14/18432	0.0380611295167161	0.0821774387292735	0.0391537935219807	SGPP2	1	0.0714285714285714
MF	GO:0106018	phosphatidylinositol-3,5-bisphosphate phosphatase activity	1/51	14/18432	0.0380611295167161	0.0821774387292735	0.0391537935219807	MTMR8	1	0.0714285714285714
MF	GO:1901681	sulfur compound binding	3/51	270/18432	0.0386636519096438	0.0823160191974383	0.0392198207810509	LIPG/PLA2G2D/LIPI	3	0.0111111111111111
MF	GO:0004029	aldehyde dehydrogenase (NAD+) activity	1/51	15/18432	0.0407247673924168	0.0823160191974383	0.0392198207810509	ALDH1L1	1	0.0666666666666667
MF	GO:0005041	low-density lipoprotein particle receptor activity	1/51	15/18432	0.0407247673924168	0.0823160191974383	0.0392198207810509	LRP2	1	0.0666666666666667
MF	GO:0008252	nucleotidase activity	1/51	15/18432	0.0407247673924168	0.0823160191974383	0.0392198207810509	NT5C1A	1	0.0666666666666667
MF	GO:0016208	AMP binding	1/51	15/18432	0.0407247673924168	0.0823160191974383	0.0392198207810509	APRT	1	0.0666666666666667
MF	GO:0017110	nucleoside diphosphate phosphatase activity	1/51	15/18432	0.0407247673924168	0.0823160191974383	0.0392198207810509	ENTPD8	1	0.0666666666666667
MF	GO:0019841	retinol binding	1/51	16/18432	0.0433811738029609	0.0867623476059218	0.0413382930421567	ADH4	1	0.0625
MF	GO:0055102	lipase inhibitor activity	1/51	17/18432	0.0460303679893231	0.088621521059323	0.0422241042166303	APOA2	1	0.0588235294117647
MF	GO:0031072	heat shock protein binding	2/51	124/18432	0.0462145139500635	0.088621521059323	0.0422241042166303	APOA2/APOA1	2	0.0161290322580645
MF	GO:0016616	oxidoreductase activity, acting on the CH-OH group of donors, NAD or NADP as acceptor	2/51	126/18432	0.0475583558628633	0.088621521059323	0.0422241042166303	ADH4/SRD5A2	2	0.0158730158730159
MF	GO:0004438	phosphatidylinositol-3-phosphatase activity	1/51	18/18432	0.0486723691423259	0.088621521059323	0.0422241042166303	MTMR8	1	0.0555555555555556
MF	GO:0004550	nucleoside diphosphate kinase activity	1/51	18/18432	0.0486723691423259	0.088621521059323	0.0422241042166303	NME3	1	0.0555555555555556
MF	GO:0016646	oxidoreductase activity, acting on the CH-NH group of donors, NAD or NADP as acceptor	1/51	18/18432	0.0486723691423259	0.088621521059323	0.0422241042166303	ALDH1L1	1	0.0555555555555556
MF	GO:0030228	lipoprotein particle receptor activity	1/51	18/18432	0.0486723691423259	0.088621521059323	0.0422241042166303	LRP2	1	0.0555555555555556
MF	GO:0034185	apolipoprotein binding	1/51	18/18432	0.0486723691423259	0.088621521059323	0.0422241042166303	LCAT	1	0.0555555555555556
MF	GO:0043395	heparan sulfate proteoglycan binding	1/51	18/18432	0.0486723691423259	0.088621521059323	0.0422241042166303	PLA2G2D	1	0.0555555555555556
