# Supplementary material for: Identification and validation for biomarkers associated with mitochondrial metabolism in chronic obstructive pulmonary disease
Source: Front Med (Lausanne). 2025 Aug 25;12:1612390. doi: 10.3389/fmed.2025.1612390 (PMC12414765; doi:10.3389/fmed.2025.1612390)
Supplement: Supplementary file 2 [file Table_2.xlsx]

## Sheet: 02.KEGG_res
ID	Description	GeneRatio	BgRatio	pvalue	p.adjust	qvalue	geneID	Count
hsa04913	Ovarian steroidogenesis	4/43	52/8876	0.000109187349945488	0.00112462970443853	0.000770058152247129	CYP1B1/PLA2G4E/PTGS2/CYP19A1	4
hsa00240	Pyrimidine metabolism	4/43	58/8876	0.000167545630107439	0.00156883635464238	0.00107421600164578	NME3/NT5C1A/DPYS/ENTPD8	4
hsa01232	Nucleotide metabolism	4/43	85/8876	0.000727316815578867	0.00624280266705195	0.00427458128454247	APRT/NME3/NT5C1A/ENTPD8	4
hsa00600	Sphingolipid metabolism	3/43	54/8876	0.00221191343198631	0.0175251602688146	0.0119998542464035	DEGS2/SGMS2/SGPP2	3
hsa00230	Purine metabolism	4/43	128/8876	0.00329651652290025	0.024252942989909	0.0166065118070915	APRT/NME3/NT5C1A/ENTPD8	4
hsa04270	Vascular smooth muscle contraction	4/43	134/8876	0.00388559245801143	0.0266810682116785	0.0182691013815274	PLA2G4E/PLA2G1B/PLA2G2A/PLA2G2D	4
hsa00190	Oxidative phosphorylation	4/43	138/8876	0.00431578643970618	0.0275469217659192	0.0188619699368072	ATP5MC1/NDUFB7/NDUFA7/COX4I2	4
hsa05208	Chemical carcinogenesis - reactive oxygen species	5/43	227/8876	0.00456536530229903	0.0275469217659192	0.0188619699368072	ATP5MC1/NDUFB7/NDUFA7/COX4I2/CYP1B1	5
hsa05204	Chemical carcinogenesis - DNA adducts	3/43	71/8876	0.00481402516297617	0.0275469217659192	0.0188619699368072	CYP1B1/PTGS2/UGT1A9	3
hsa00980	Metabolism of xenobiotics by cytochrome P450	3/43	79/8876	0.00648441575702388	0.0351523591038663	0.0240695764942161	CYP1B1/ADH4/UGT1A9	3
hsa00983	Drug metabolism - other enzymes	3/43	81/8876	0.00694947034423242	0.035789772272797	0.0245060270033459	NME3/DPYS/UGT1A9	3
hsa05012	Parkinson disease	5/43	271/8876	0.0095353437021839	0.046768590539283	0.0320234600524472	ATP5MC1/NDUFB7/NDUFA7/COX4I2/TH	5
hsa05231	Choline metabolism in cancer	3/43	99/8876	0.0120294289240615	0.0563195990535604	0.0385632410484267	PLA2G4E/DGKB/SLC44A5	3
hsa04972	Pancreatic secretion	3/43	106/8876	0.0144542820965605	0.0647300459106839	0.0443220549413983	PLA2G1B/PLA2G2A/PLA2G2D	3
hsa05415	Diabetic cardiomyopathy	4/43	205/8876	0.0168839512154179	0.0724602906328353	0.0496151197996931	ATP5MC1/NDUFB7/NDUFA7/COX4I2	4
hsa04071	Sphingolipid signaling pathway	3/43	122/8876	0.0209726171265423	0.0864071825613541	0.0591648567359297	DEGS2/SGMS2/SGPP2	3
hsa04714	Thermogenesis	4/43	235/8876	0.0263746054405586	0.104484013860675	0.0715424520047542	ATP5MC1/NDUFB7/NDUFA7/COX4I2	4
hsa04014	Ras signaling pathway	4/43	238/8876	0.0274695904294677	0.104791400527229	0.0717529262680053	PLA2G4E/PLA2G1B/PLA2G2A/PLA2G2D	4
hsa04923	Regulation of lipolysis in adipocytes	2/43	59/8876	0.0329516317338142	0.120475738643755	0.0824923299860154	PTGS2/CIDEC	2
hsa04370	VEGF signaling pathway	2/43	60/8876	0.0339847682616506	0.120475738643755	0.0824923299860154	PLA2G4E/PTGS2	2
hsa04723	Retrograde endocannabinoid signaling	3/43	149/8876	0.0350900209642006	0.120475738643755	0.0824923299860154	NDUFB7/NDUFA7/PTGS2	3
hsa00561	Glycerolipid metabolism	2/43	65/8876	0.0393370285219755	0.12491223299321	0.0855300931072567	LIPG/DGKB	2
hsa05010	Alzheimer disease	5/43	391/8876	0.0394032990448215	0.12491223299321	0.0855300931072567	ATP5MC1/NDUFB7/NDUFA7/COX4I2/PTGS2	5
hsa04932	Non-alcoholic fatty liver disease	3/43	157/8876	0.0400204241628731	0.12491223299321	0.0855300931072567	NDUFB7/NDUFA7/COX4I2	3
hsa00830	Retinol metabolism	2/43	68/8876	0.0426926848341265	0.129333721703383	0.088557581544473	ADH4/UGT1A9	2
hsa05020	Prion disease	4/43	278/8876	0.0446984198421881	0.131541064107011	0.0900689963737325	ATP5MC1/NDUFB7/NDUFA7/COX4I2	4
hsa00982	Drug metabolism - cytochrome P450	2/43	73/8876	0.0485142984110781	0.138804798231696	0.0950426313901239	ADH4/UGT1A9	2
hsa00591	Linoleic acid metabolism	4/43	30/8876	1.19416363944085e-05	0.000176438980092257	0.000120811565316109	PLA2G4E/PLA2G1B/PLA2G2A/PLA2G2D	4
hsa00140	Steroid hormone biosynthesis	5/43	63/8876	1.19909986470466e-05	0.000176438980092257	0.000120811565316109	CYP1B1/CYP21A2/CYP19A1/SRD5A2/UGT1A9	5
hsa00565	Ether lipid metabolism	6/43	50/8876	1.22040450300951e-07	4.73173397496709e-06	3.23992004417777e-06	GDPD3/TMEM86B/PLA2G4E/PLA2G1B/PLA2G2A/PLA2G2D	6
hsa04979	Cholesterol metabolism	6/43	51/8876	1.37817494416517e-07	4.73173397496709e-06	3.23992004417777e-06	LCAT/LRP2/APOA2/LIPG/ABCB11/APOA1	6
hsa00350	Tyrosine metabolism	4/43	36/8876	2.51316459703743e-05	0.000323569941868569	0.000221555300001984	PNMT/ADH4/TPO/TH	4
hsa00564	Glycerophospholipid metabolism	8/43	103/8876	2.59003141327482e-08	2.66773235567307e-06	1.82665373357277e-06	LCAT/SGMS2/PHOSPHO1/PLA2G4E/PLA2G1B/PLA2G2A/DGKB/PLA2G2D	8
hsa00590	Arachidonic acid metabolism	6/43	63/8876	4.98054241794202e-07	1.28248967262007e-05	8.7814826842662e-06	PLA2G4E/CYP4F3/PLA2G1B/PLA2G2A/PTGS2/PLA2G2D	6
hsa04975	Fat digestion and absorption	4/43	43/8876	5.13724632970529e-05	0.000587929302177383	0.000402567841041233	PLA2G1B/PLA2G2A/APOA1/PLA2G2D	4
hsa00592	alpha-Linolenic acid metabolism	4/43	26/8876	6.60673925380169e-06	0.000136098828628315	9.3189795790466e-05	PLA2G4E/PLA2G1B/PLA2G2A/PLA2G2D	4
